# Supplementary material for: Highly efficient triphenyl(3-sulfopropyl)phosphonium functionalized phosphotungstic acid on silica as a solid acid catalyst for selective mono-allylation of acetals
Source: Royal Society of Chemistry journal article supplement (doi:10.1039/c5cy00531k), 2015-01-01

## **Highly Efficient Triphenyl (3-sulfopropyl) phosphonium functionalized Phosphotungstic acid on Silica as a Solid Acid Catalyst for Selective mono-Allylation of Acetals**

*Sumit B. Kamble, Suhas S. Shinde, Chandrashekhar V. Rode\**

Chemical Engineering and Process Development Division,  
CSIR-National Chemical Laboratory, India, Pune-411008,

*Email: cv.rode@ncl.res.in*

### **Supporting Information**

#### **Contents**

Experimental procedure for acetals synthesis, S1

Ammonia-TPD study, S2

BET Surface Area S2

Pyridine-FTIR study, S3-S4

EDAX, S5

<sup>1</sup>H and <sup>13</sup>C-NMR of the products, S6-S48

#### **Experimental procedure for the synthesis of acetals using PVP-PWA catalyst**

To the solution of aldehydes (1 mmol) in 3 mL of methanol/ethanol, the catalyst PVP-PWA (0.01 mmol) was added and the mixture was stirred for 2 h at room temperature under inert condition. After completion of the reaction monitored by TLC, reaction crude was filtered through sintered glass plug using celite to separate the catalyst and washed two times with 3 mL methanol. Finally methanol was evaporated at reduced pressure using rota vapour to obtain the product with excellent yields. If required column chromatography were done over neutral alumina.

## Ammonia-TPD study

**Table S1.** Total acidity measurement of catalysts using ammonia-TPD

| Sr. No. | Sample Name  | Temperature, °C  | Total acidity (NH <sub>3</sub> mmol/gm) |
|---------|--------------|------------------|-----------------------------------------|
| 1       | Silica       | 100-200,         | 0.01191                                 |
| 2       | PW           | 100-200, 550-650 | 0.3983                                  |
| 3       | PW-TPSP      | 250-550          | 0.2381                                  |
| 4       | 30PW-Si/TPSP | 250-550          | 0.176                                   |

### Order of total acidity:

PW (0.3983 NH<sub>3</sub> mmoles / gm) > PW-TPSP (0.2381 NH<sub>3</sub> mmoles / gm) > 30PW-Si/TPSP (0.176 NH<sub>3</sub> mmoles / gm) > Silica (0.01191 NH<sub>3</sub> mmoles / gm)

**Figure S1.** BET Surface area of Silica (A), 30PW-Si (B) and 30PW-Si/TPSP (C)

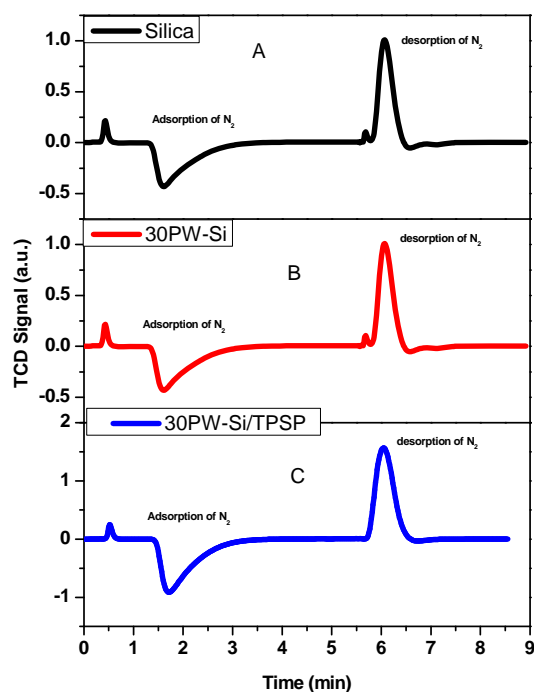

**Surface Area:** Silica; 232.57 m<sup>2</sup>/g, 30PW-Si; 116.70 m<sup>2</sup>/g and 30PW-Si/TPSP; 110.69 m<sup>2</sup>/g.

**Table S2.** Comparison of Brønsted acidity under Pyridine-FTIR study

| Sr. No. | Sample Name  | Area, (%T) |
|---------|--------------|------------|
| 1       | PW           | -257.1     |
| 2       | PW-TPSP      | -79.04     |
| 3       | 30PW-Si/TPSP | -71.58     |

**Order of Brønsted acidity:** PW >PW-TPSP>30PW-Si/TPSP

**Figure S2.** Area under curve by Pyridine-FTIR

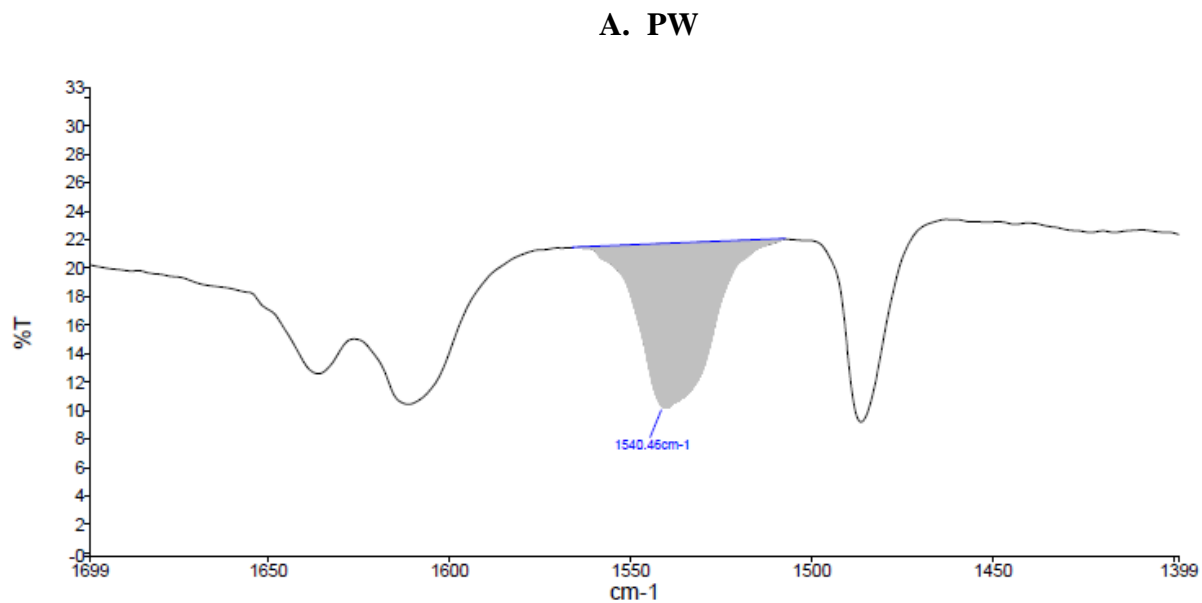

### B. PW-TPSP

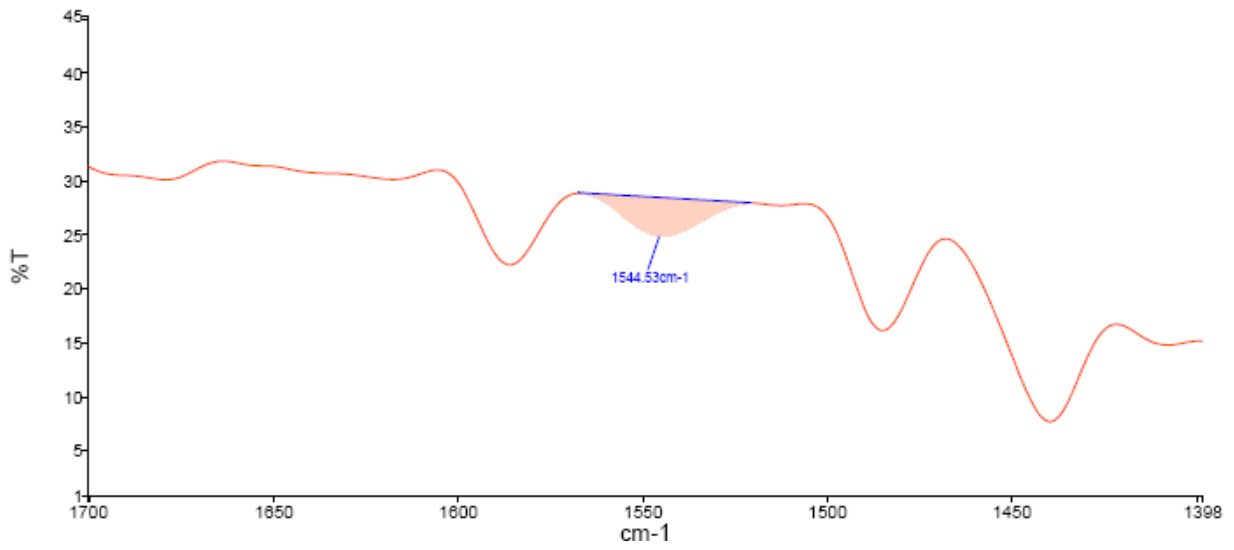

### C. 30PW-Si/TPSP

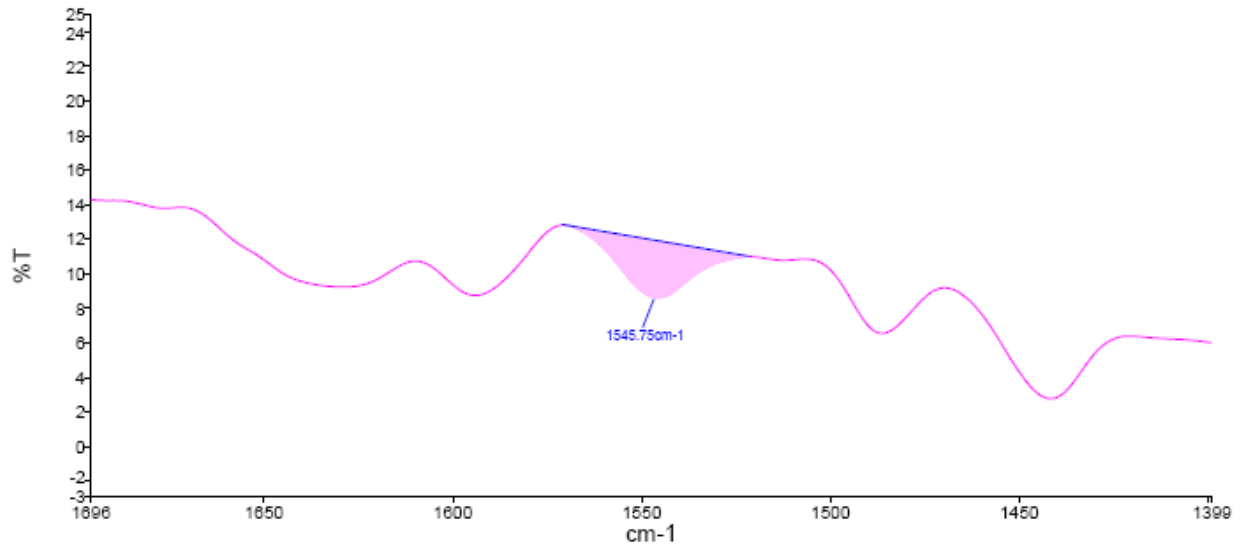

## Energy-dispersive X-ray spectroscopy (EDAX) compositional study

**Fig. S3.** 30PW-Si/TPSP fresh

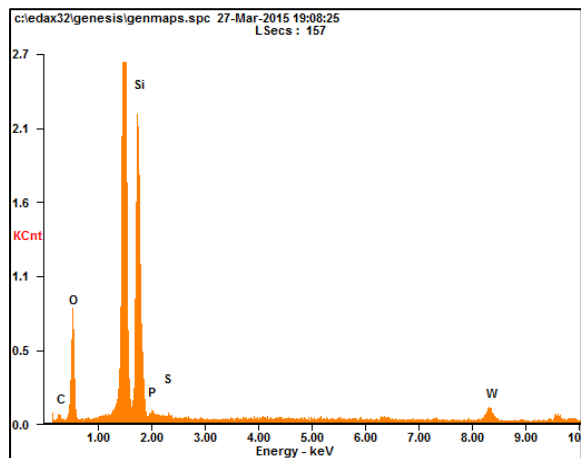

**Table S3.** 30PW-Si/TPSP fresh

| <i>Element</i> | <i>Wt%</i>        | <i>At%</i>   |
|----------------|-------------------|--------------|
| <i>CK</i>      | <b>16.07</b>      | <b>25.21</b> |
| <i>OK</i>      | <b>46.83</b>      | <b>55.15</b> |
| <i>SiK</i>     | <b>26.46</b>      | <b>17.75</b> |
| <i>PK</i>      | <b>00.97</b>      | <b>00.59</b> |
| <i>SK</i>      | <b>00.61</b>      | <b>00.36</b> |
| <i>WL</i>      | <b>09.05</b>      | <b>00.93</b> |
| <i>Matrix</i>  | <b>Correction</b> | <b>ZAF</b>   |

**Fig. S4.** 30PW-Si/TPSP recovered

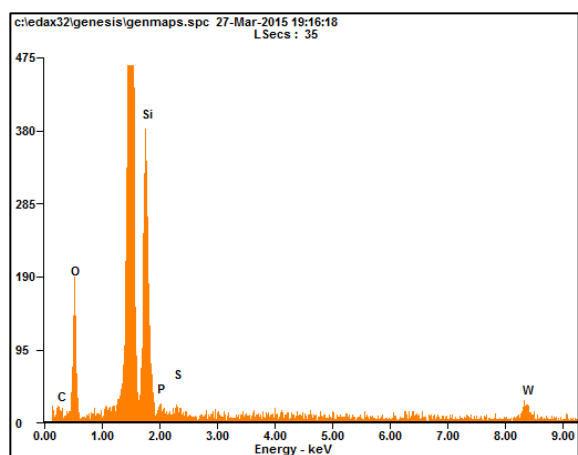

**Table S4.** 30PW-Si/TPSP recovered

| <i>Element</i> | <i>Wt%</i>        | <i>At%</i>   |
|----------------|-------------------|--------------|
| <i>CK</i>      | <b>19.99</b>      | <b>30.18</b> |
| <i>OK</i>      | <b>47.60</b>      | <b>53.94</b> |
| <i>SiK</i>     | <b>21.69</b>      | <b>14.00</b> |
| <i>PK</i>      | <b>00.91</b>      | <b>00.53</b> |
| <i>SK</i>      | <b>00.80</b>      | <b>00.45</b> |
| <i>WL</i>      | <b>09.00</b>      | <b>00.89</b> |
| <i>Matrix</i>  | <b>Correction</b> | <b>ZAF</b>   |

# $^1\text{H-NMR}$ and $^{13}\text{C-NMR}$ of products

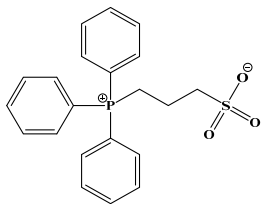

## *Triphenyl-(3-sulfopropyl) phosphonium Zwitterion*

MON4AV2#039.001.001.1R.esp

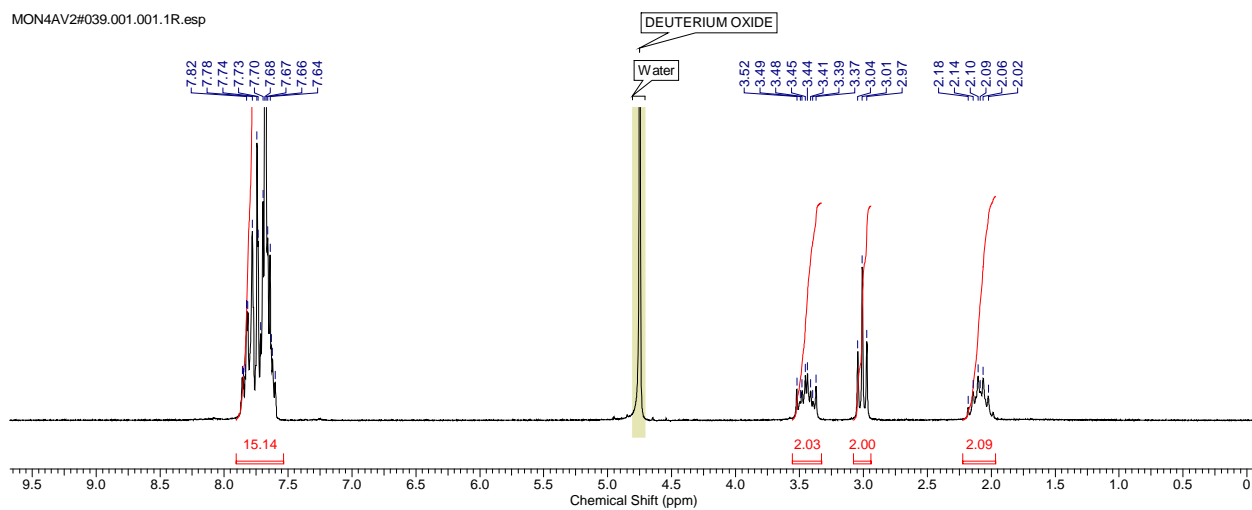

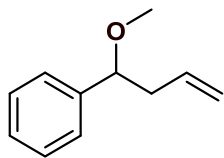

(1-methoxybut-3-en-1-yl) benzene (Table 2, entry 1)

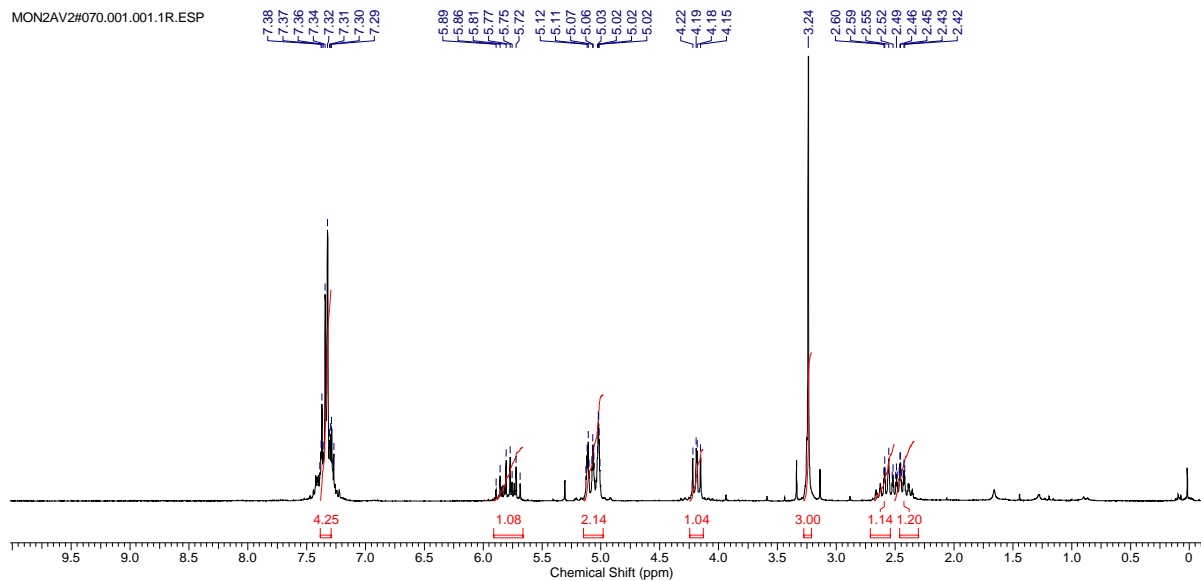

THU2AV2#116.002.001.1R.esp

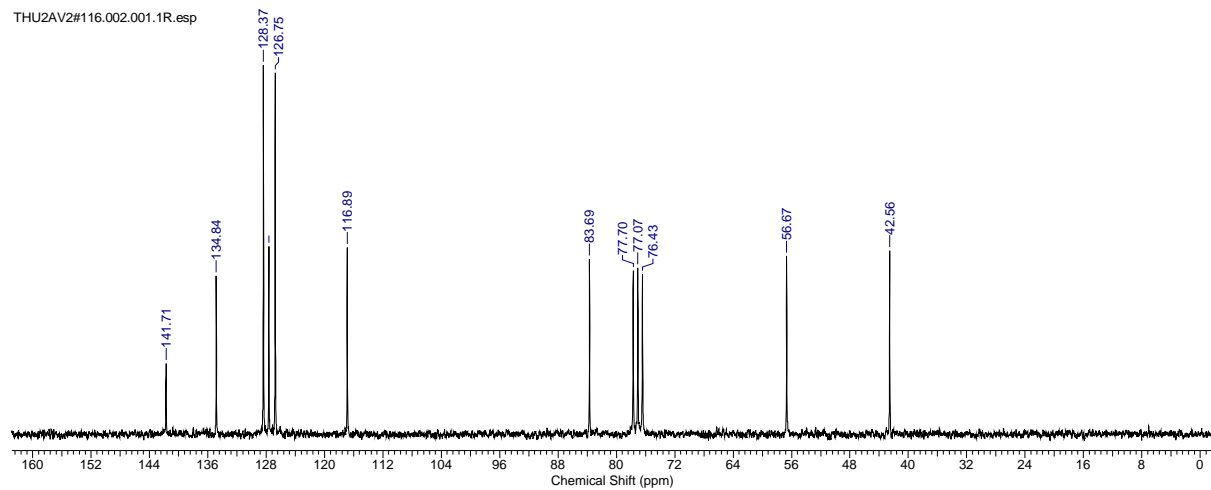

THU2AV2#116.001.001.1R.esp

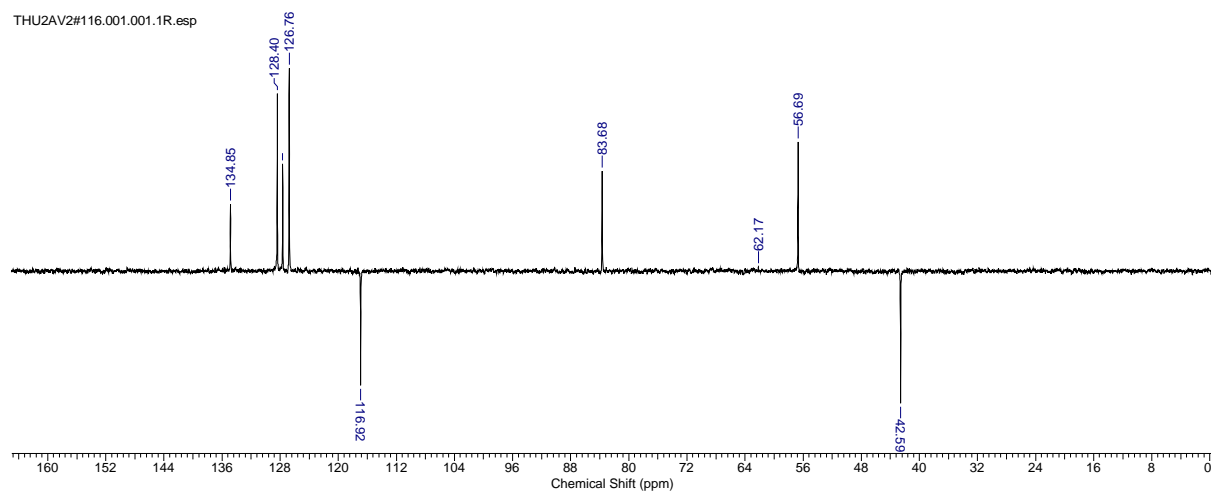



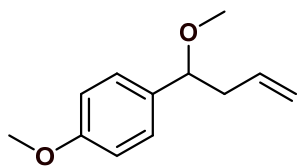

*1-methoxy-4-(1-methoxybut-3-en-1-yl) benzene (Table 2, entry 2)*

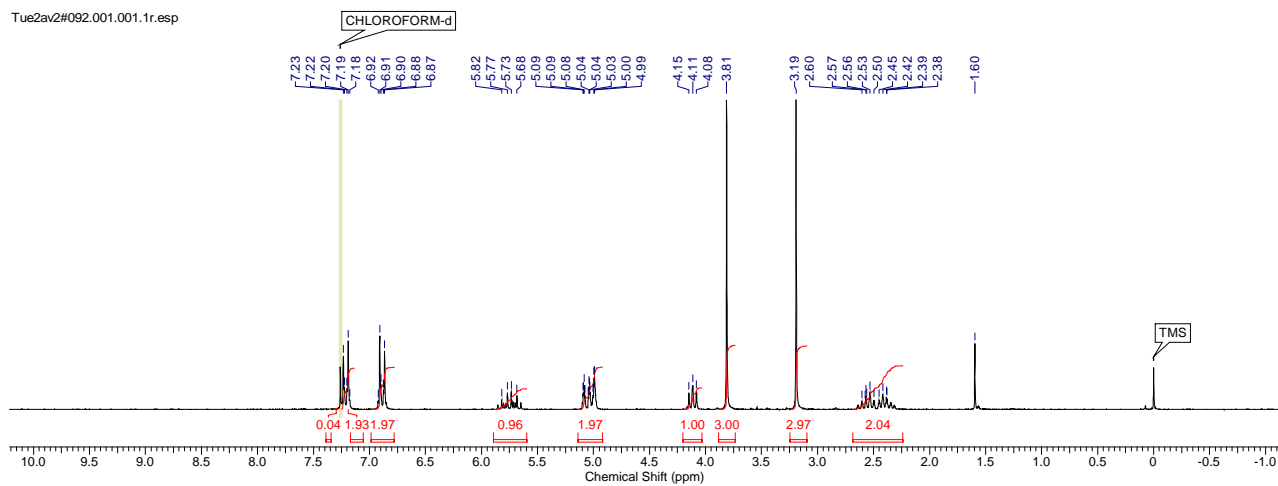

Sat2av2#060.002.001.1r.esp

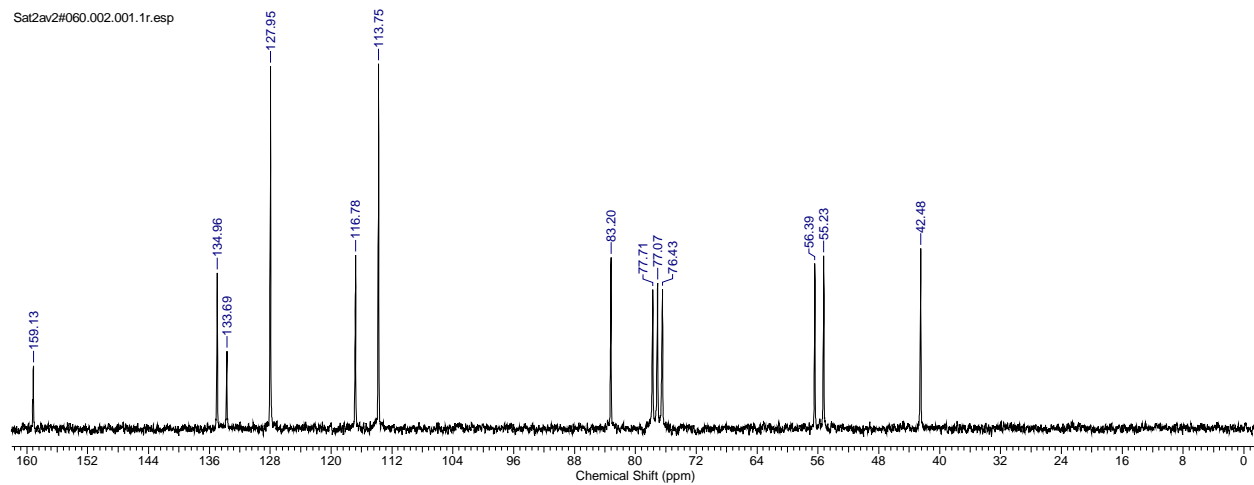

Sat2av2#060.001.001.1r.esp

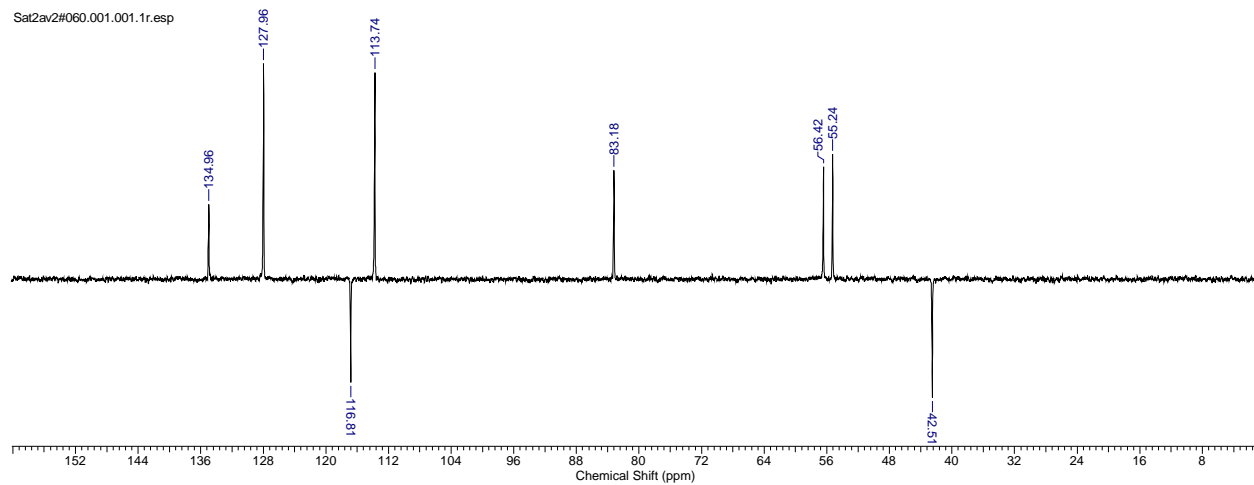

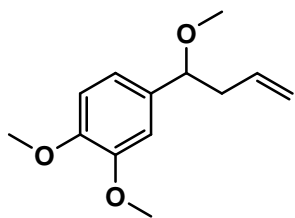

1, 2-dimethoxy-4-(1-methoxybut-3-en-1-yl) benzene (Table 2, entry 3)

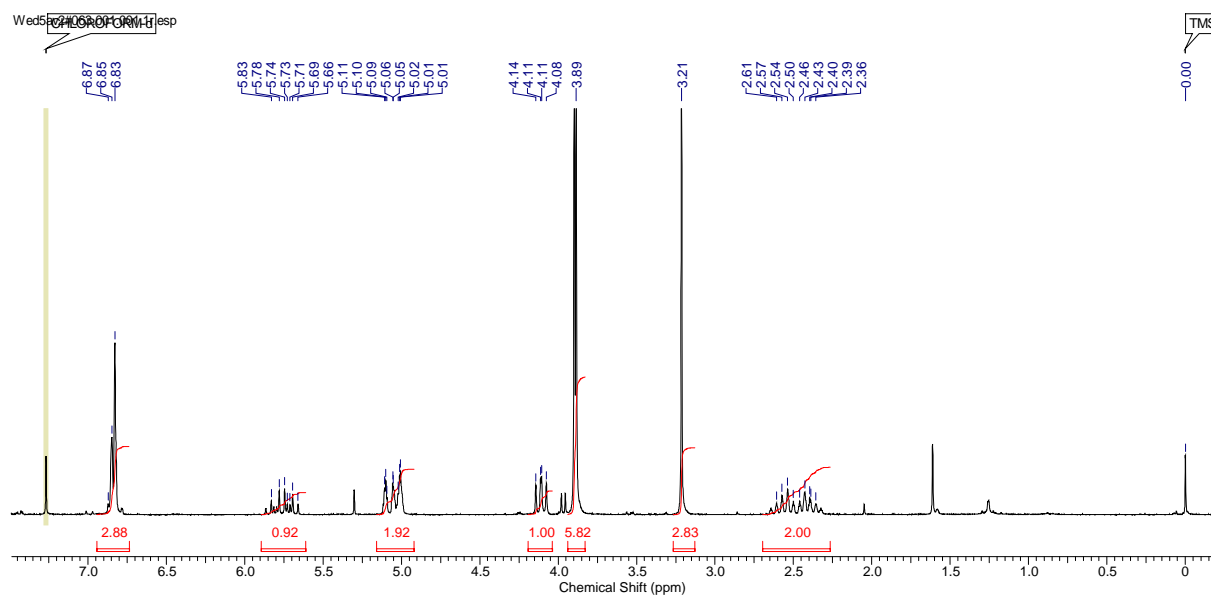

Sat1av2#065.002.001.1r.esp

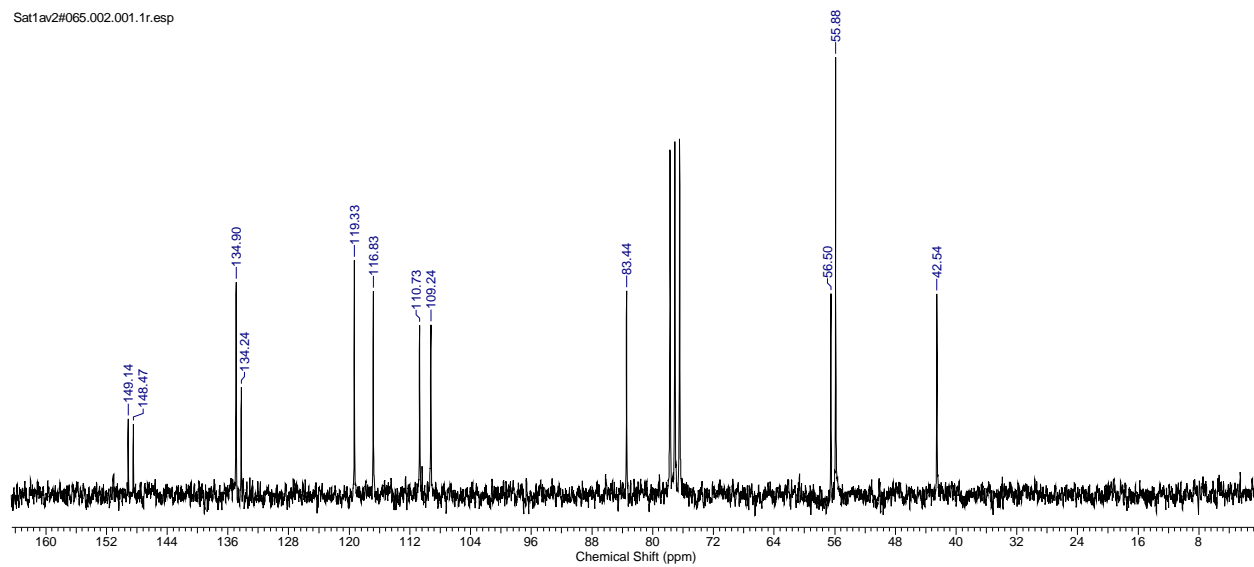

Sat1av2#065.001.001.1r.esp

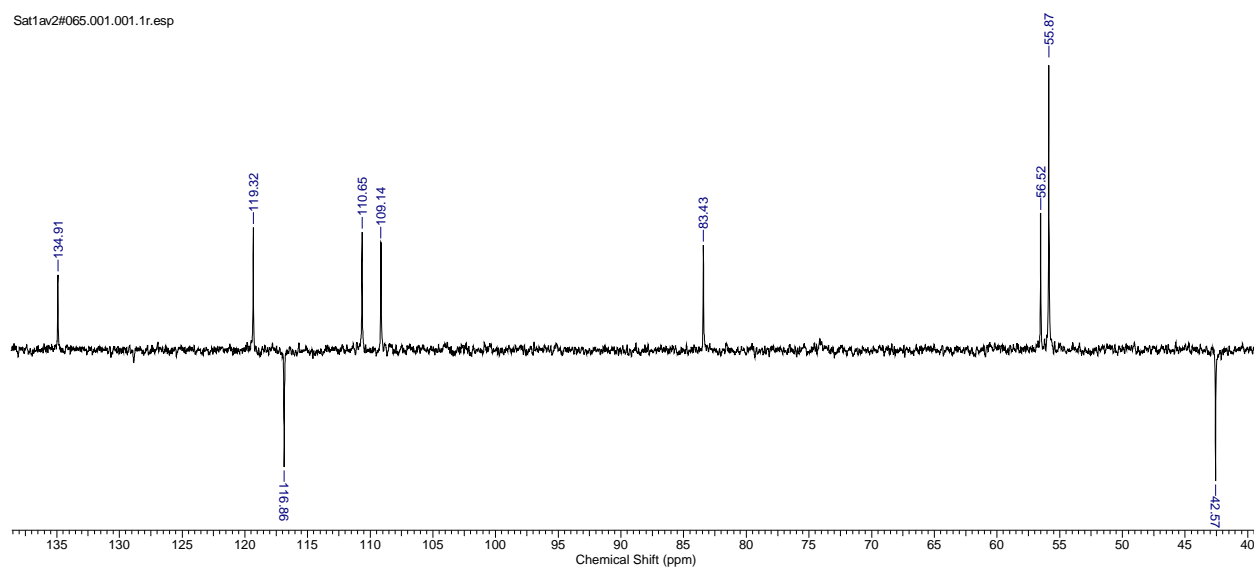

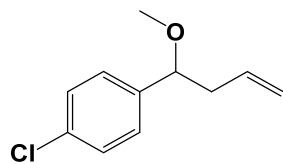

*1-chloro-4-(1-methoxybut-3-en-1-yl) benzene (Table 2, entry 4)*

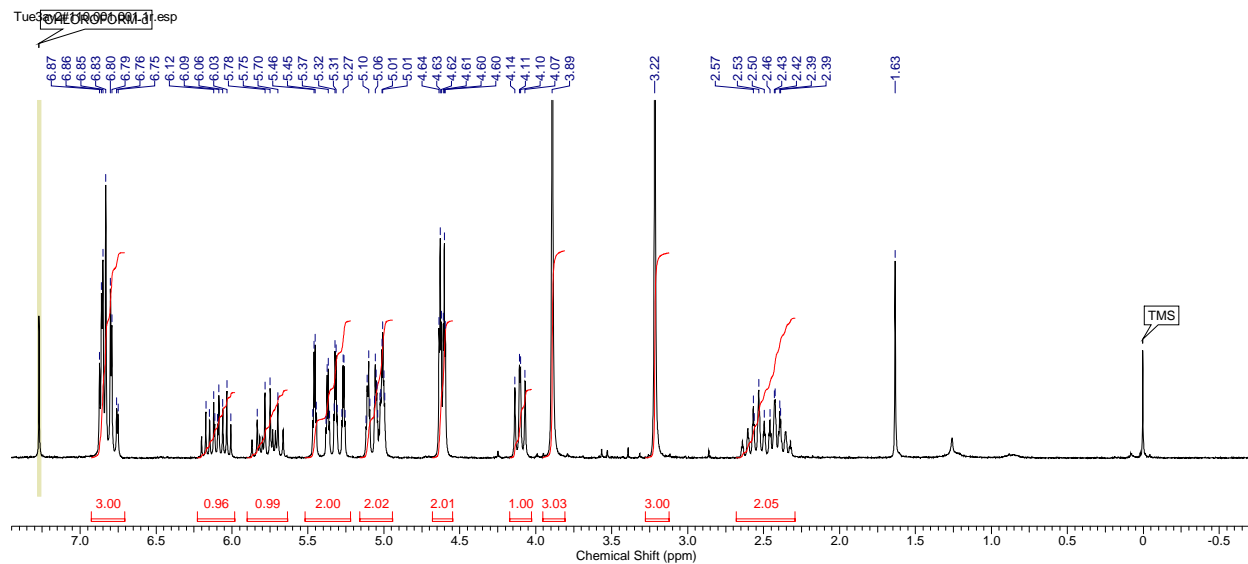

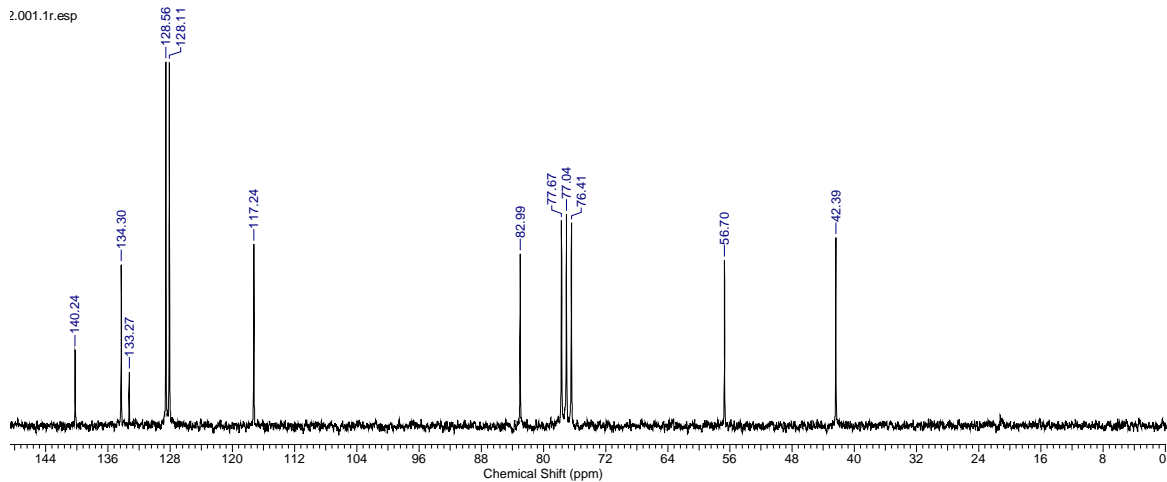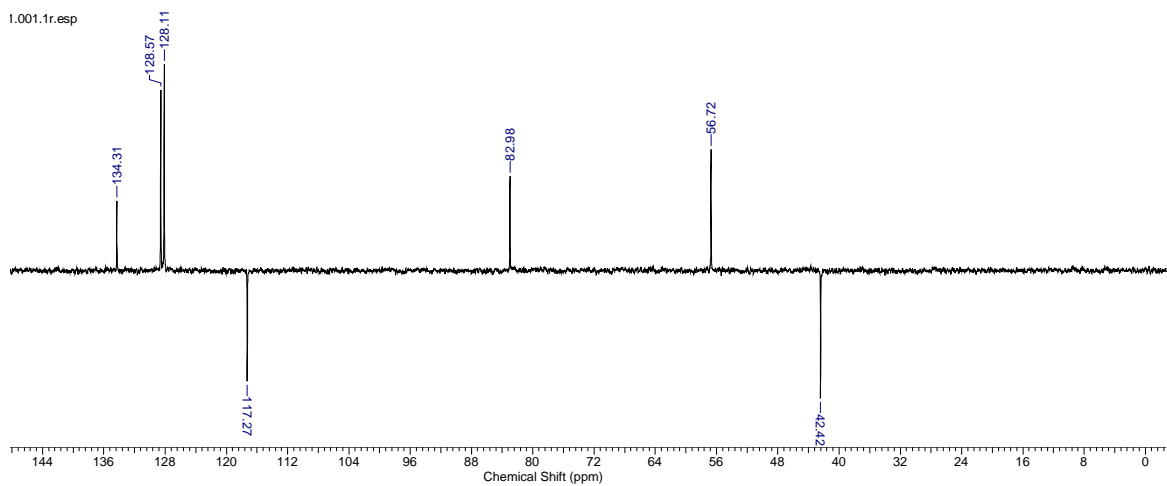

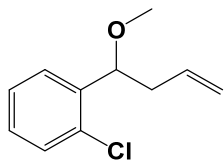

1-chloro-2-(1-methoxybut-3-en-1-yl) benzene (Table 2, entry 5)

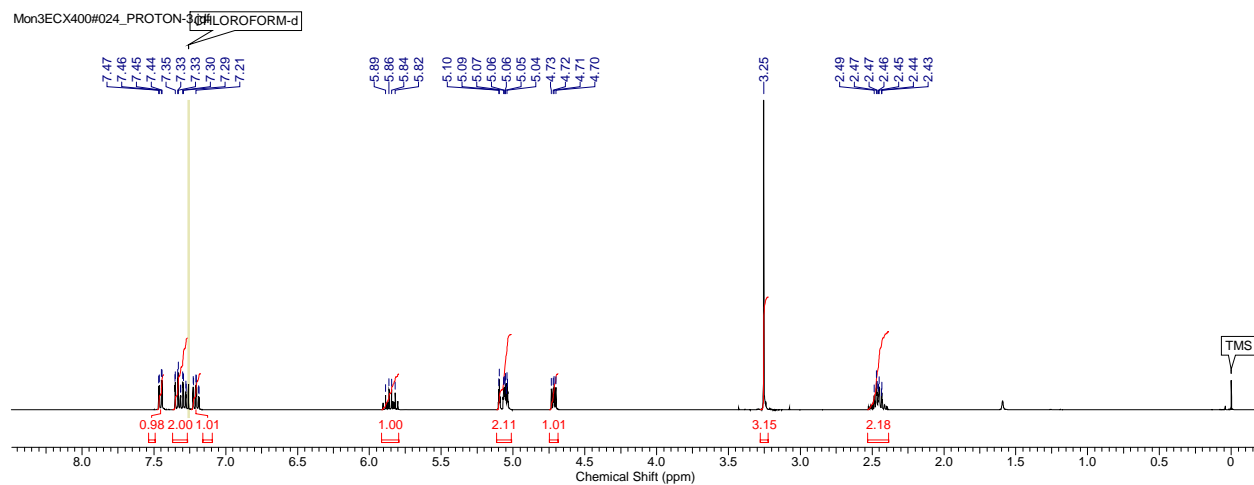

Tue3ECX400#005\_CARBON-3.jdf

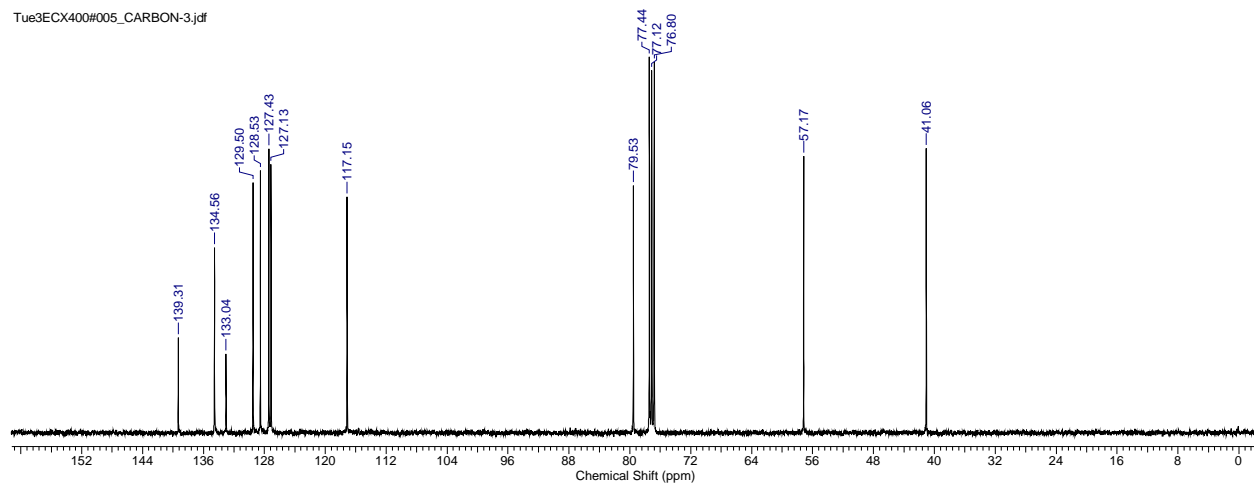

Tue3ECX400#005\_DEPT135-3.jdf

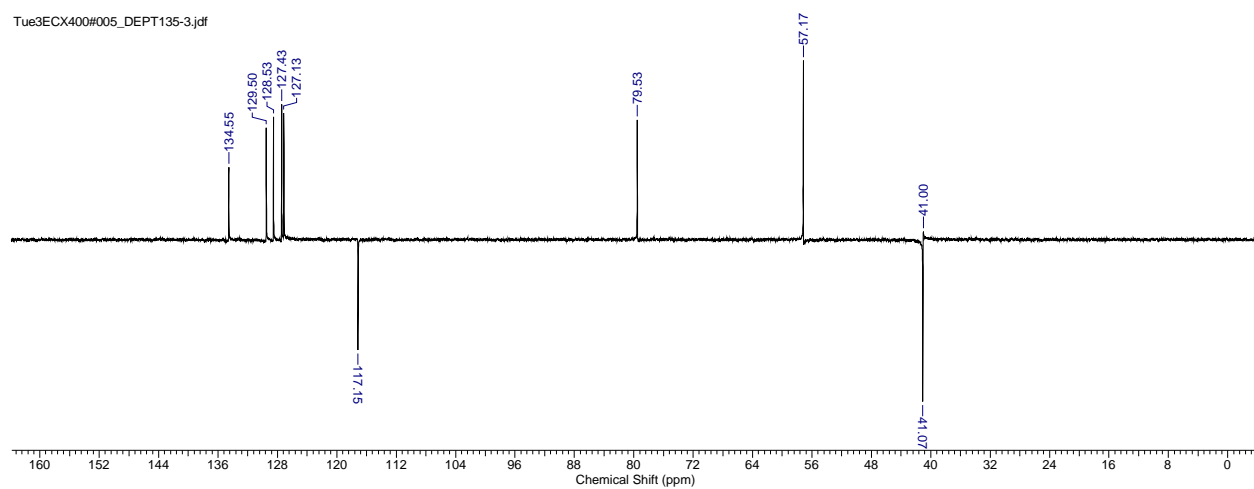



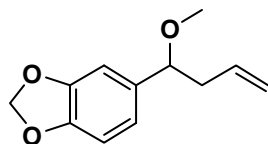

5-(1-methoxybut-3-en-1-yl) benzo [d] [1, 3] dioxole (Table 2, entry 6)

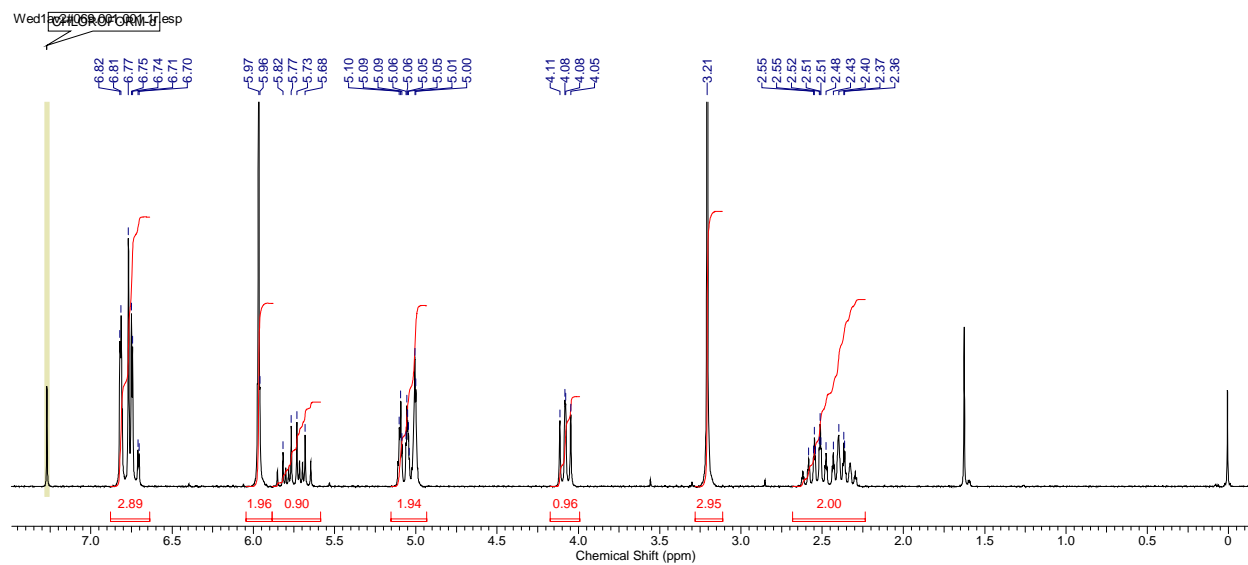

Sat1a2#075.002.001.1r.esp

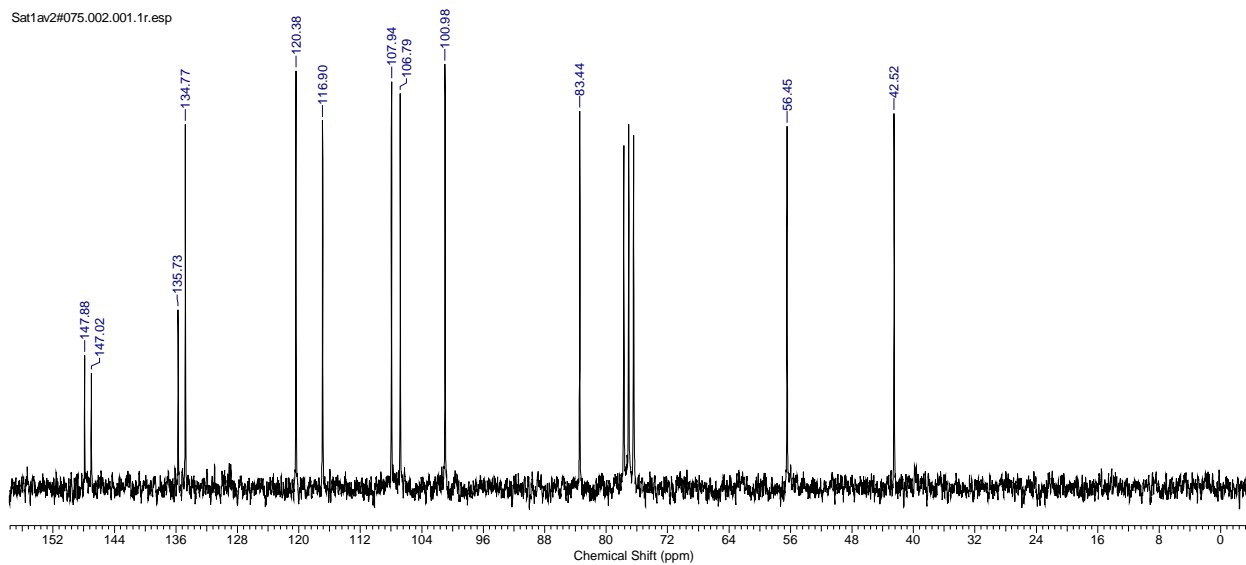

Sat1a2#075.001.001.1r.esp

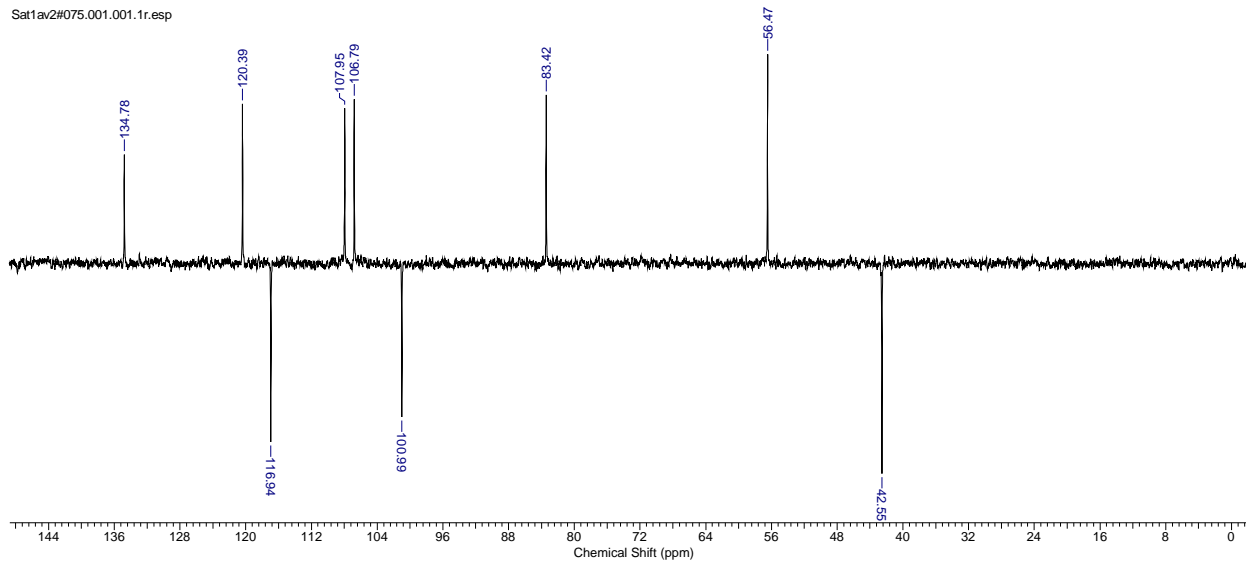

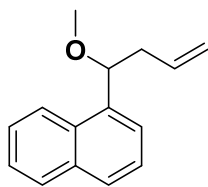

*1-(1-methoxybut-3-en-1-yl) naphthalene (Table 2, entry 7)*

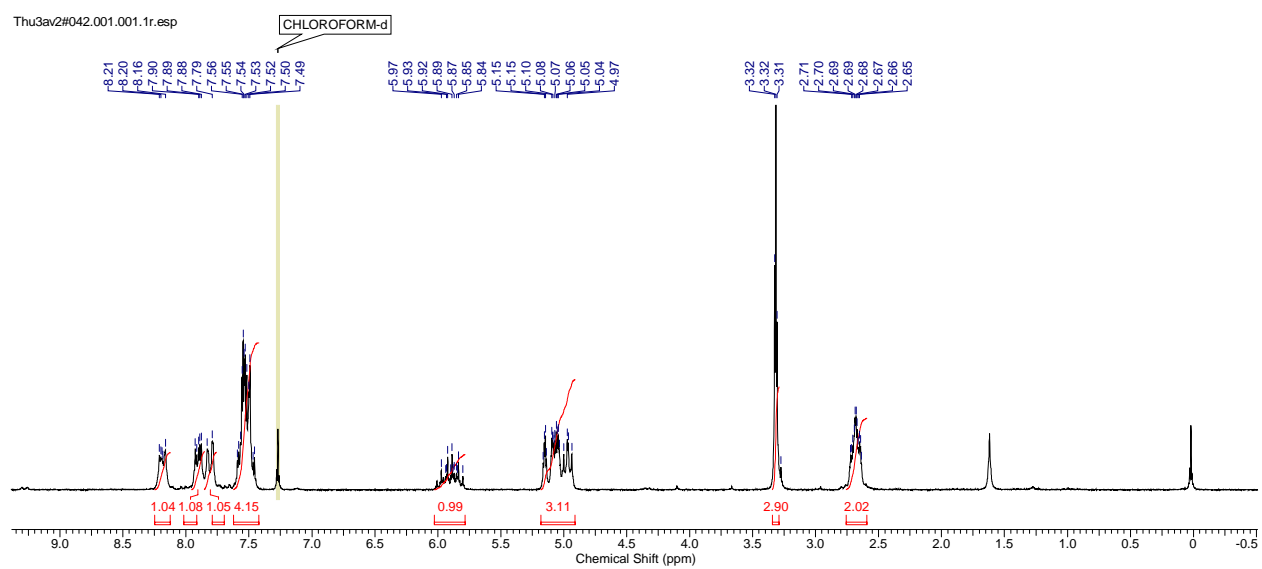

Sat3av2#067.002.001.1r.esp

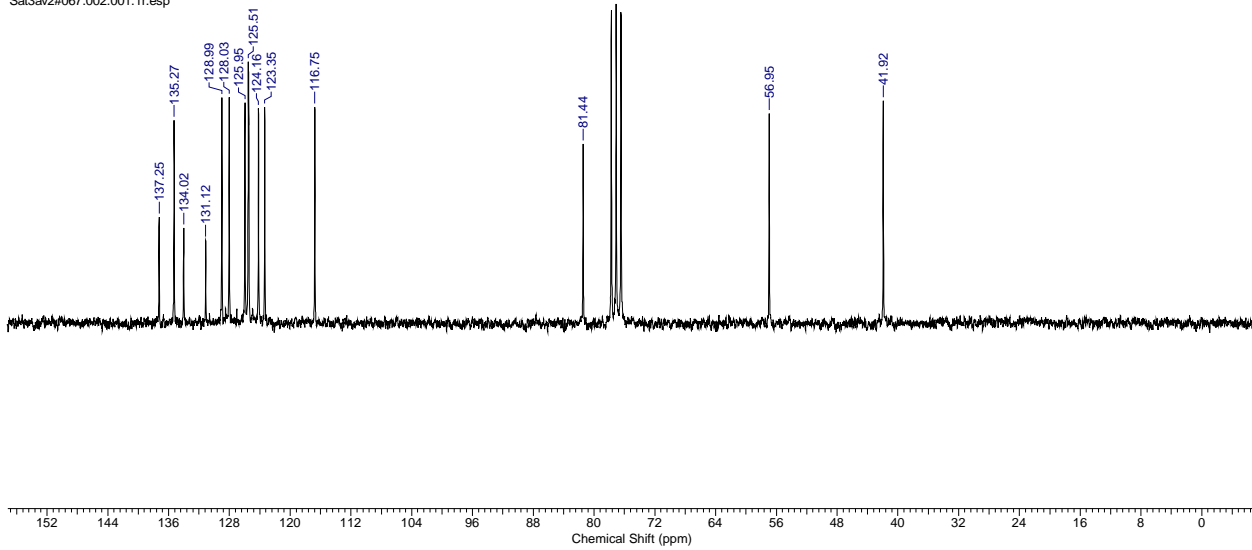

Sat3av2#067.001.001.1r.esp

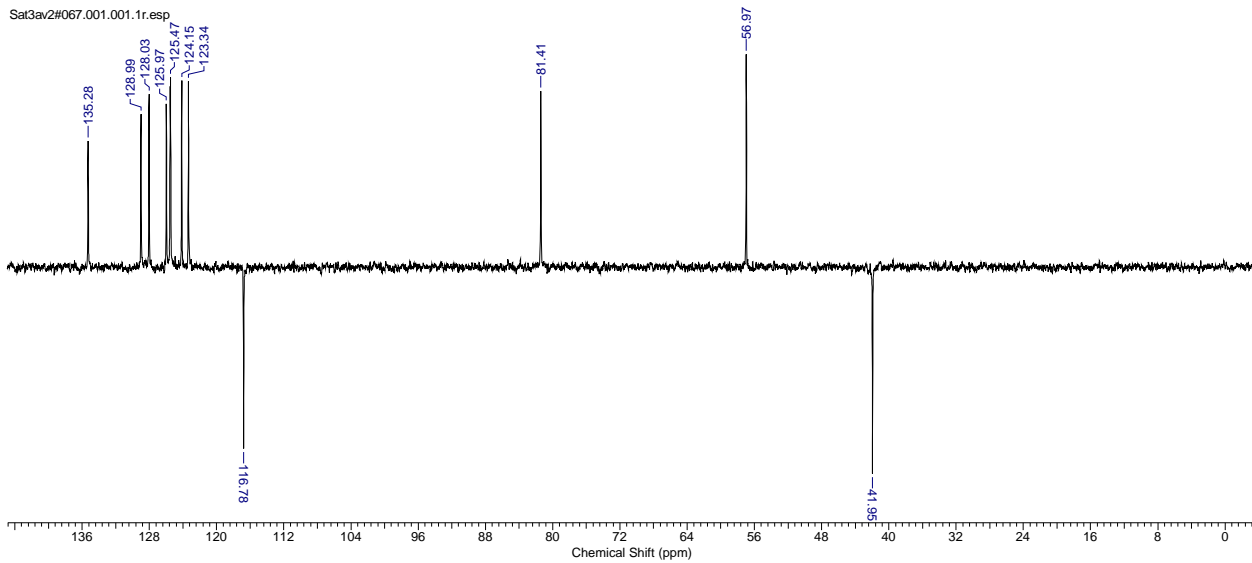

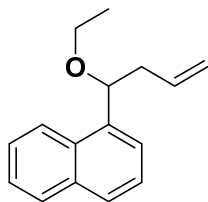

1-(1-ethoxybut-3-en-1-yl) naphthalene (Table 2, entry 8)

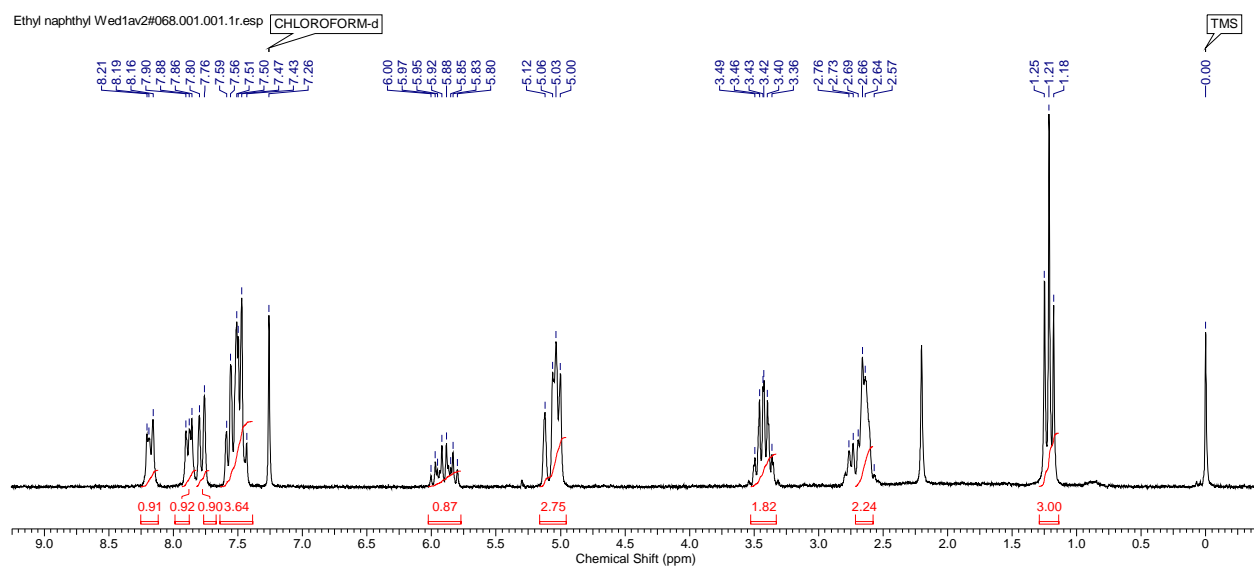

Sat1av2#074.002.001.1r.esp

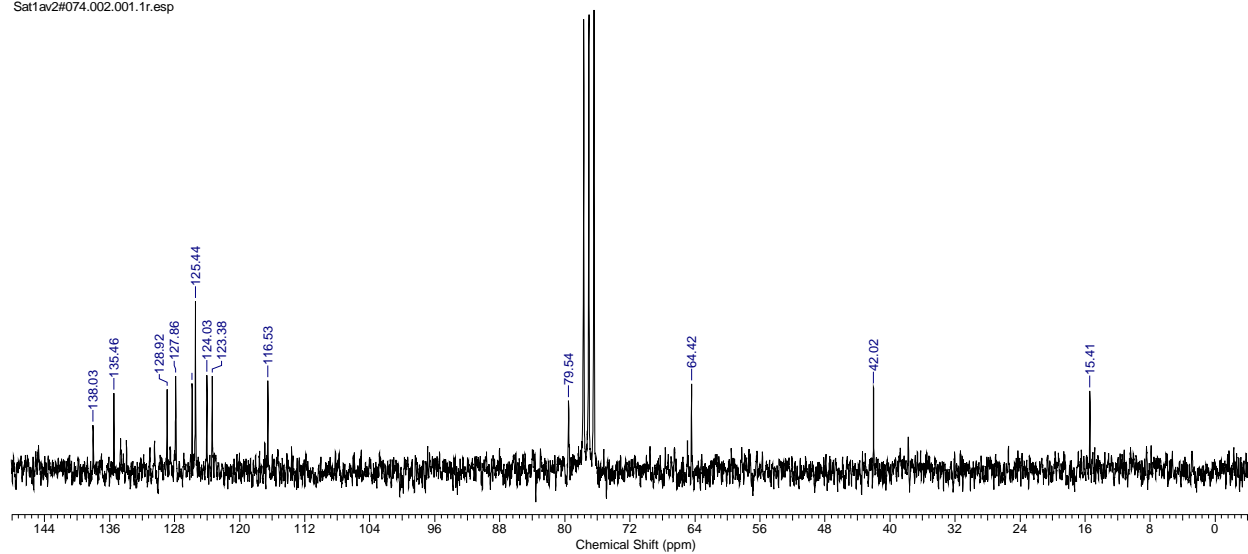

Sat1av2#074.001.001.1r.esp

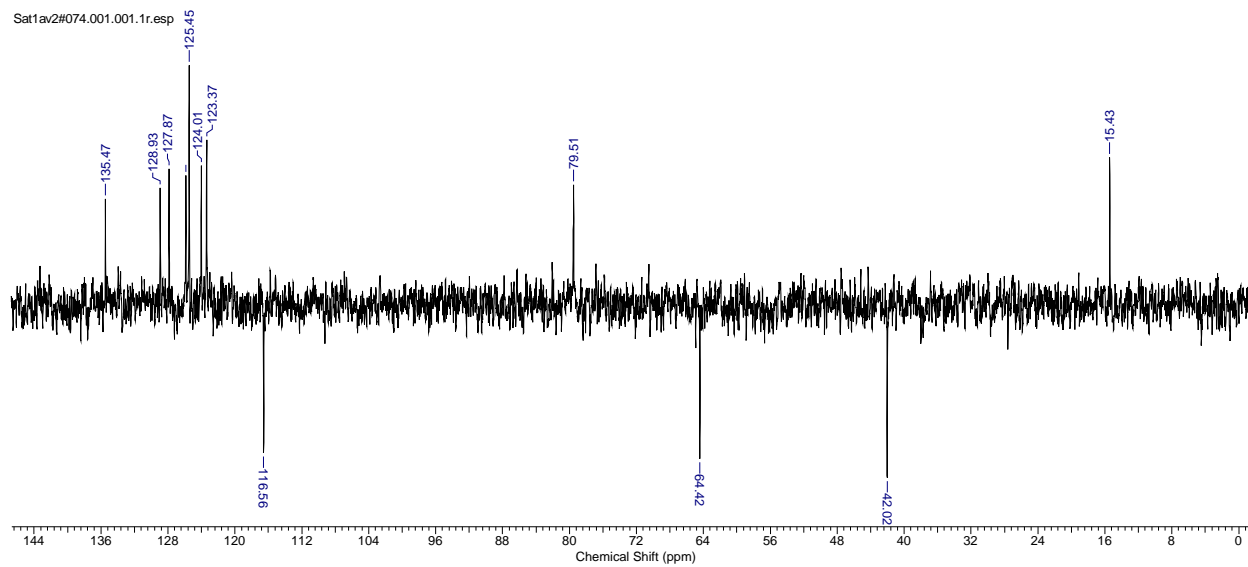

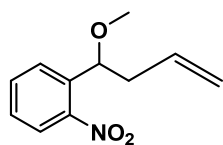

1-(1-methoxybut-3-en-1-yl)-2-nitrobenzene (Table 2, entry 9)

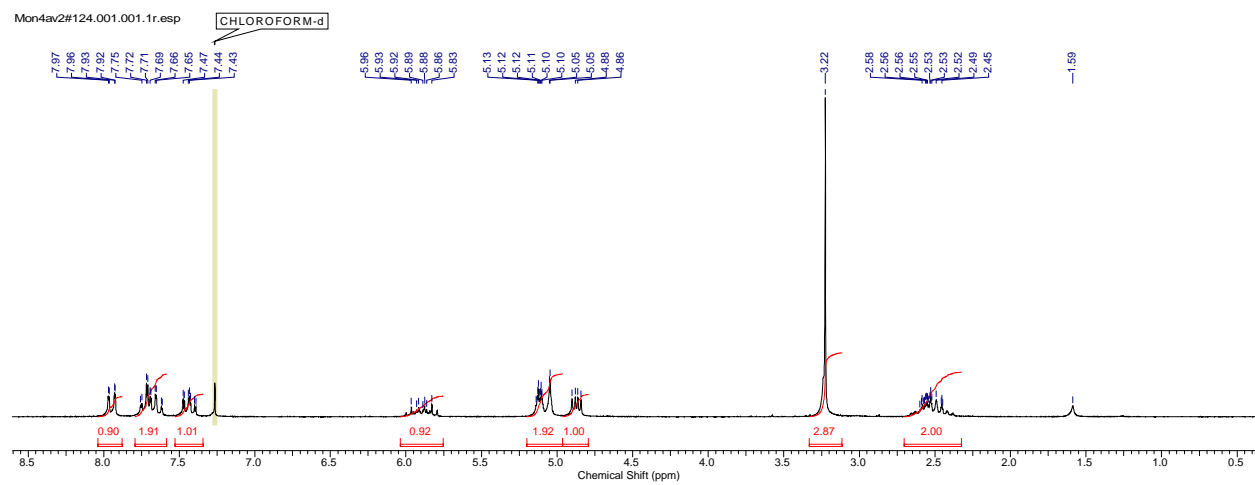

Sat4ECX400#061\_CARBON-3.jdf

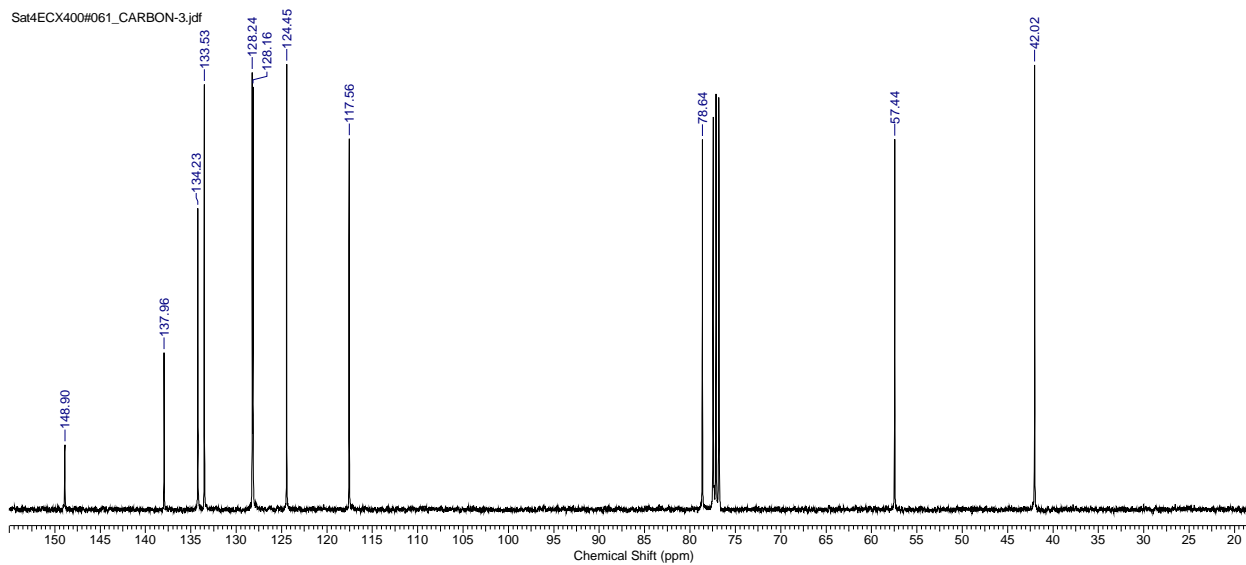

Sat4ECX400#061\_DEPT135-3.jdf

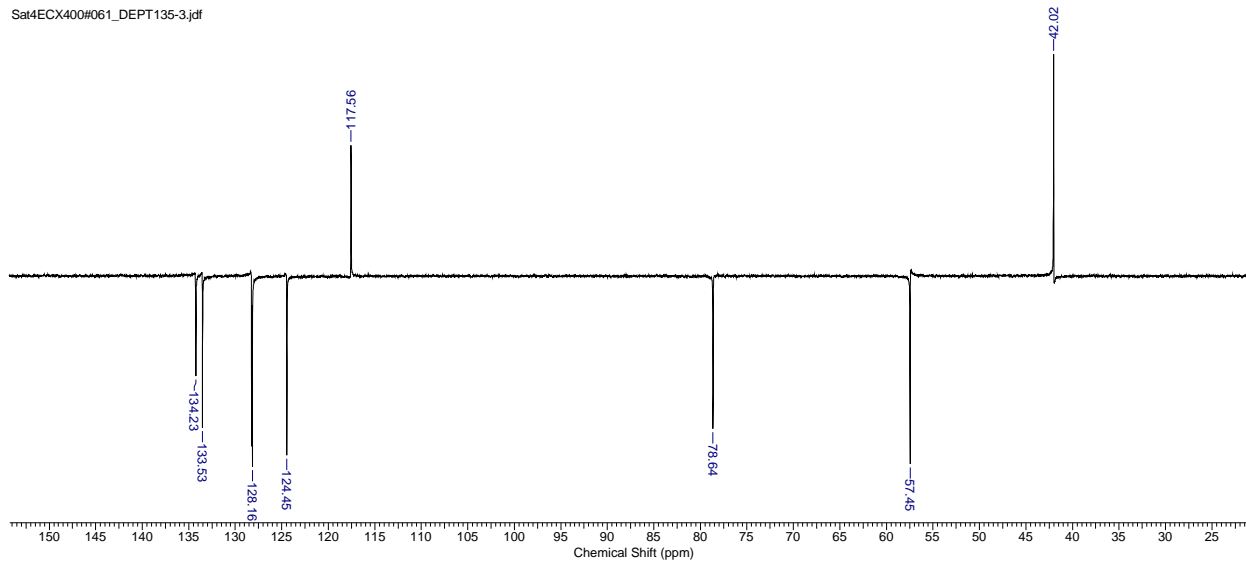



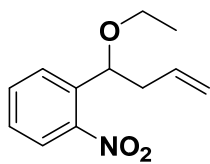

1-(1-ethoxybut-3-en-1-yl)-2-nitrobenzene (Table 2, entry 10)

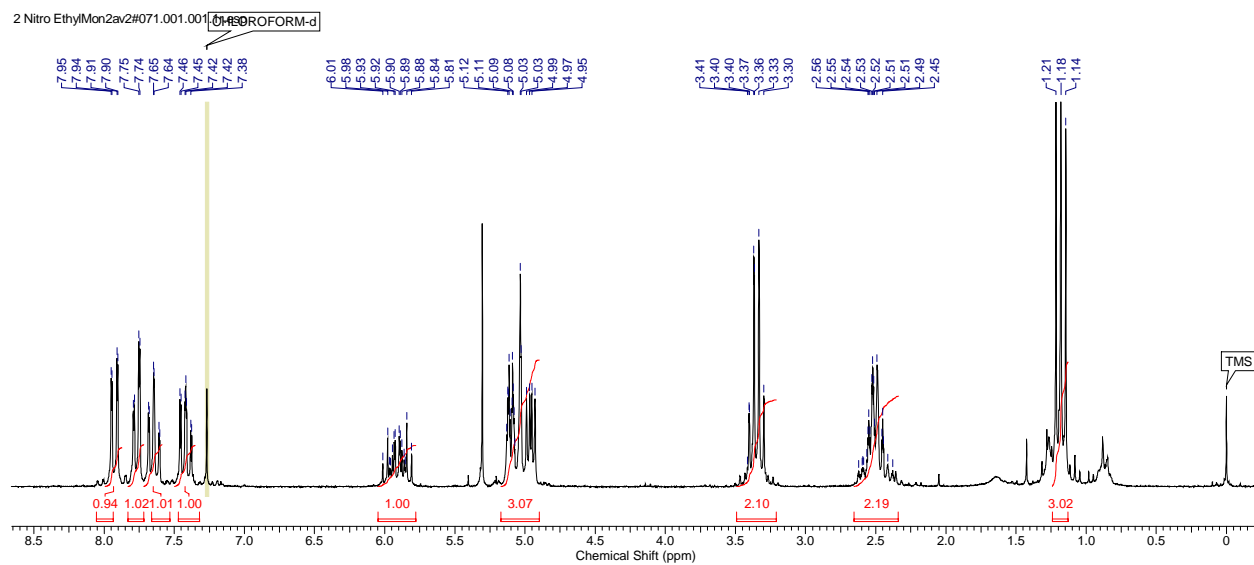

Sat2av2#054.002.001.1r.esp

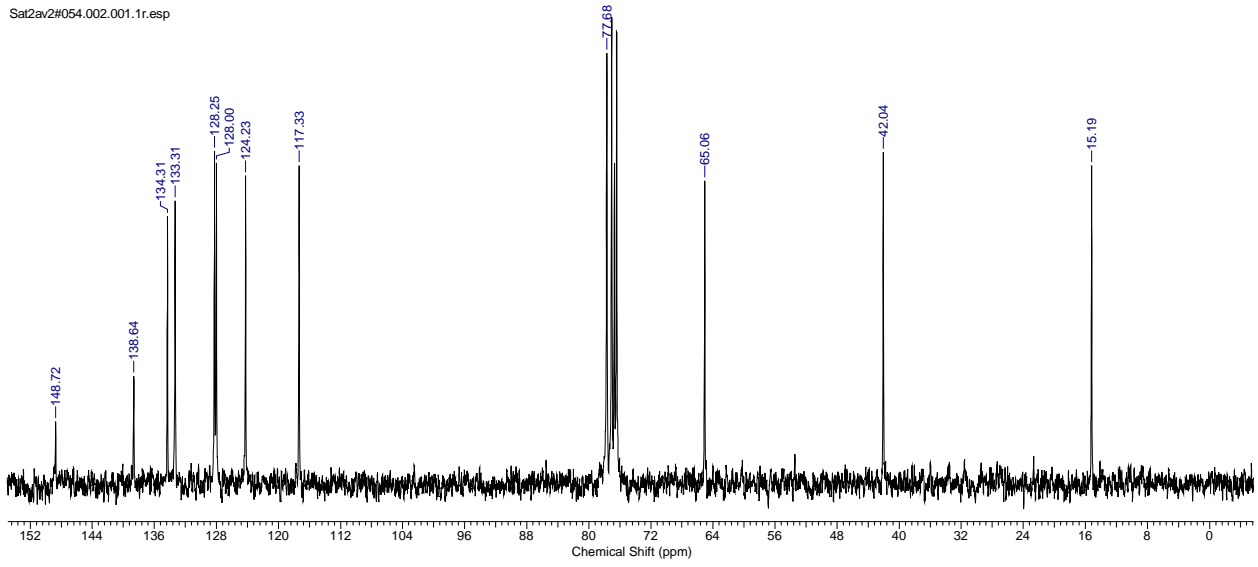

Sat2av2#054.001.001.1r.esp

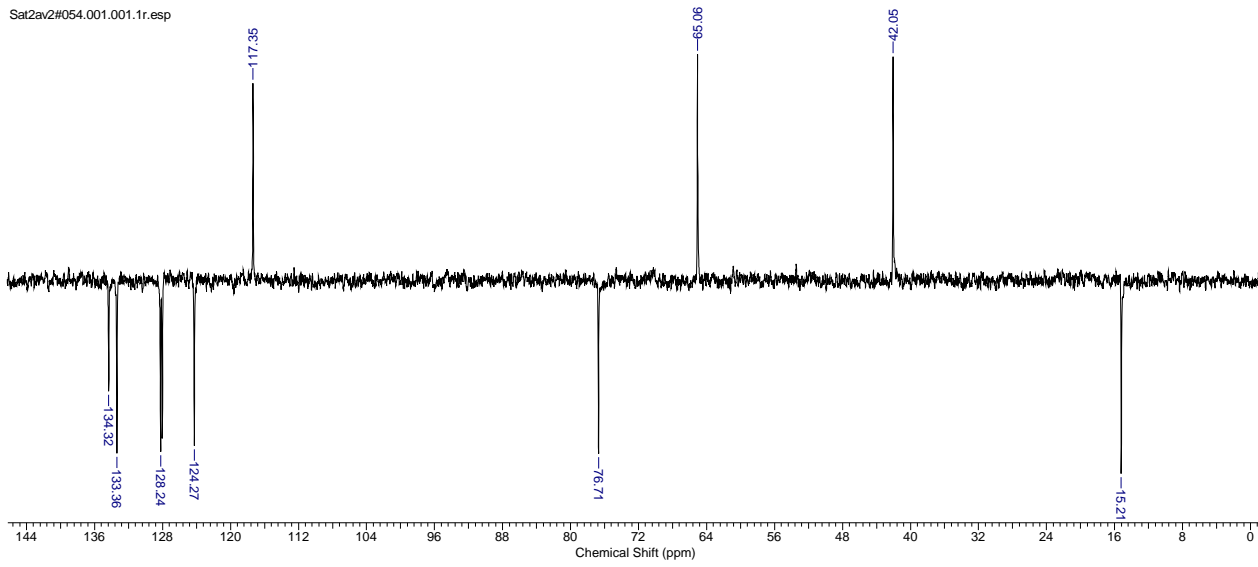

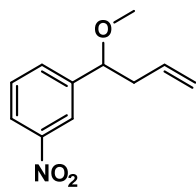

1-(1-methoxybut-3-en-1-yl)-3-nitrobenzene (Table 2, entry 11)

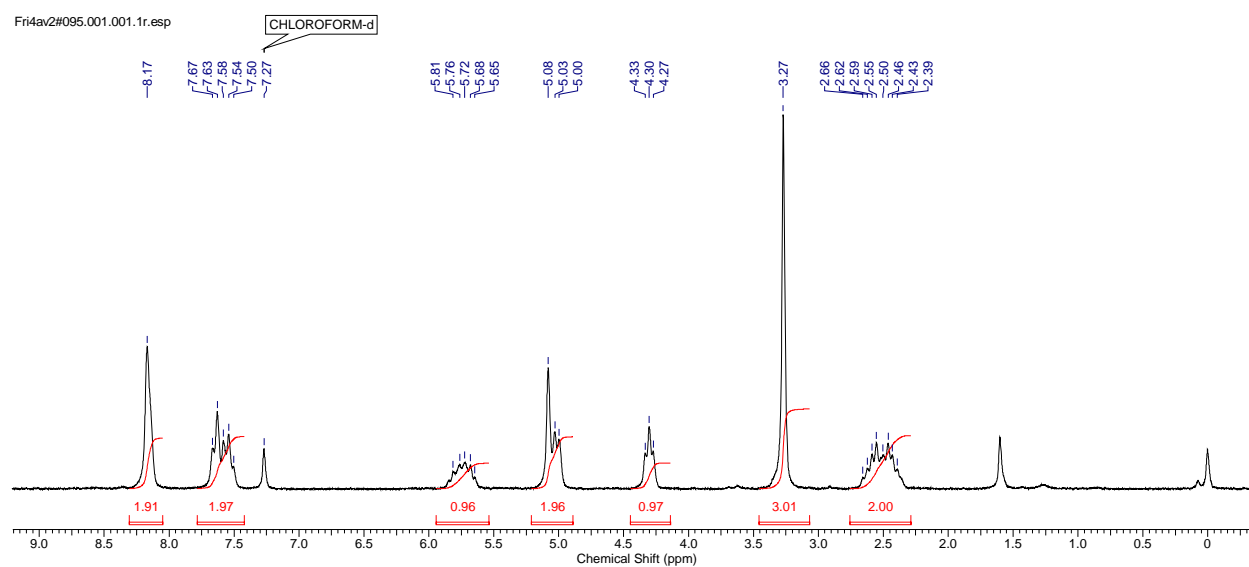

Sat5av2#056.002.001.1r.esp

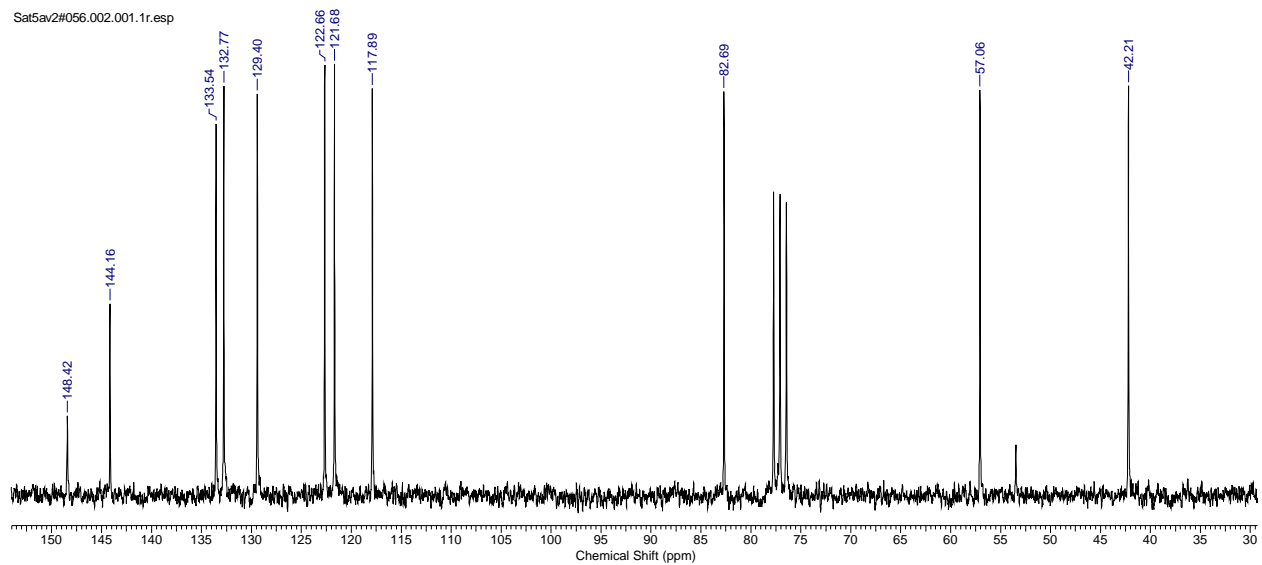

Sat5av2#056.001.001.1r.esp

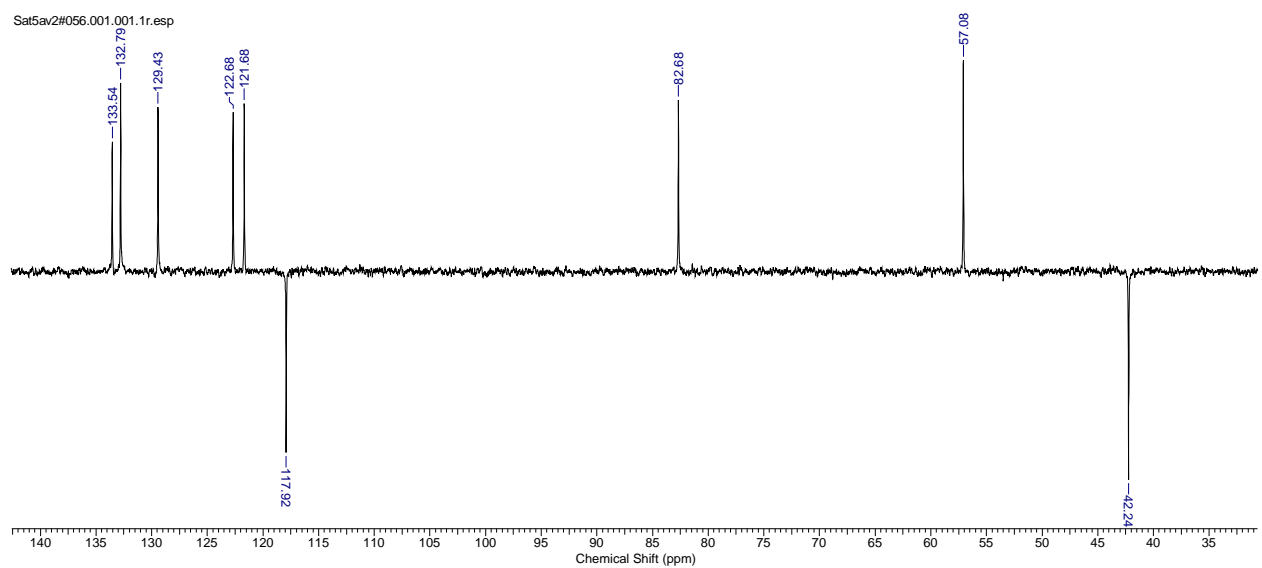

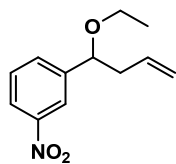

1-(1-ethoxybut-3-en-1-yl)-3-nitrobenzene (Table 2, entry 12)

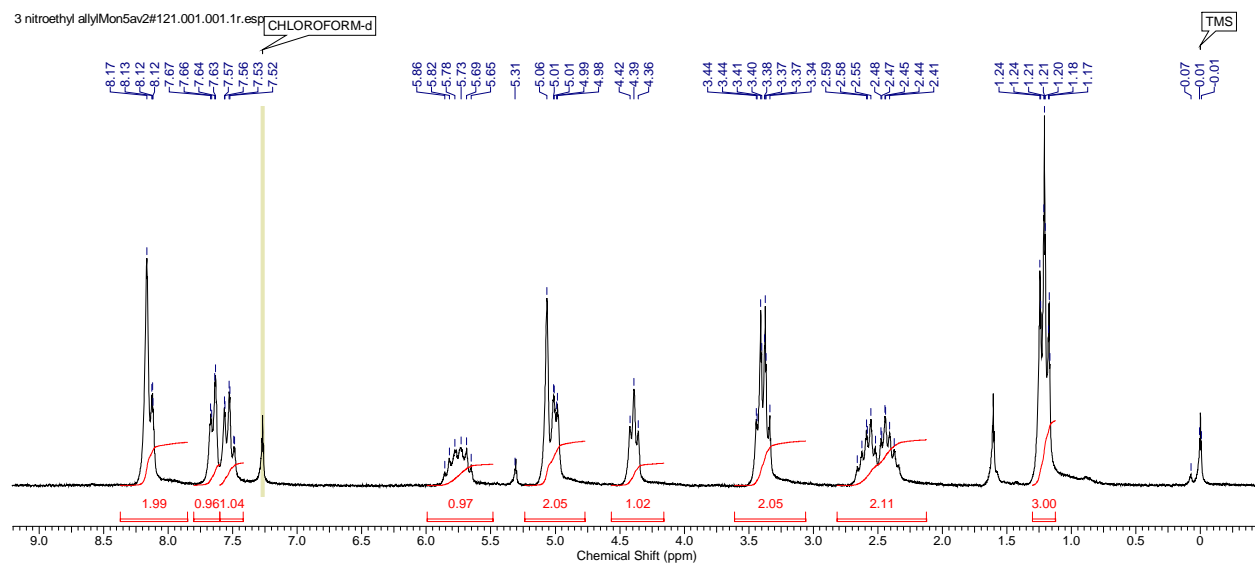

Sat5av2#050.002.001.1r.esp

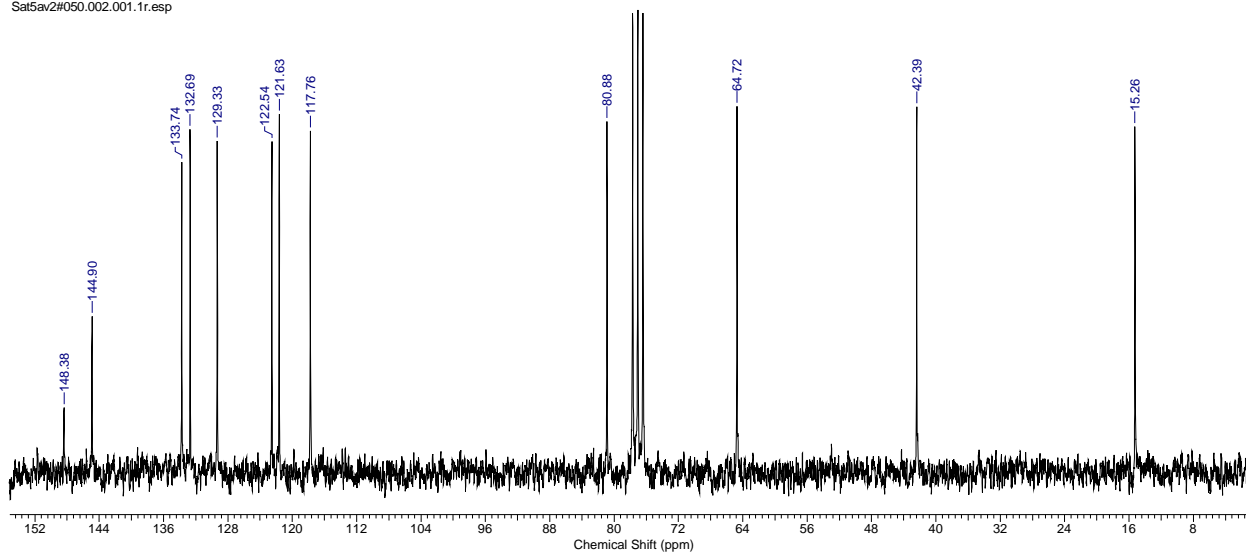

Sat5av2#050.001.001.1r.esp

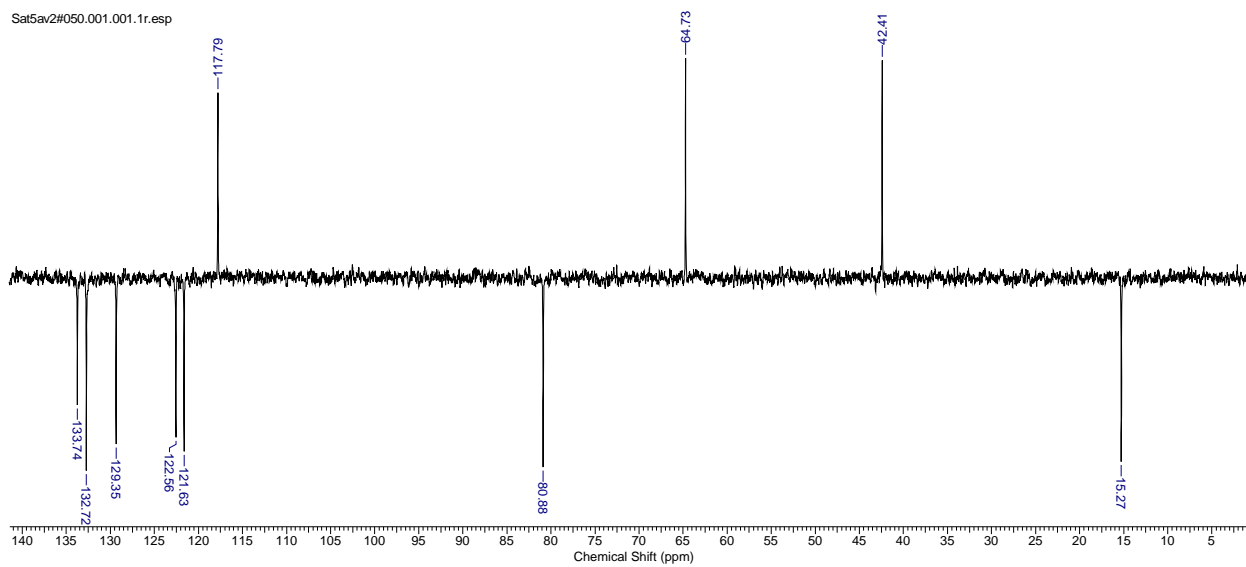

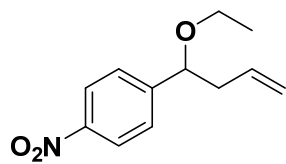

1-(1-ethoxybut-3-en-1-yl)-4-nitrobenzene (Table 2, entry 13)

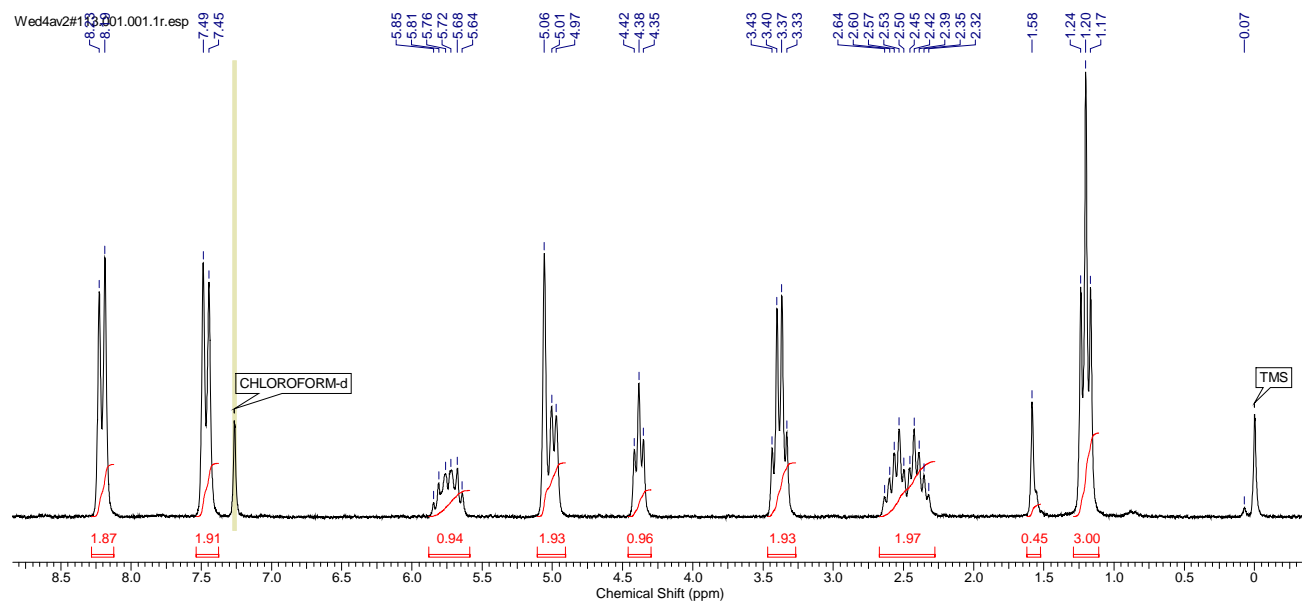

Sat4ECX400#037\_CARBON-3.jdf

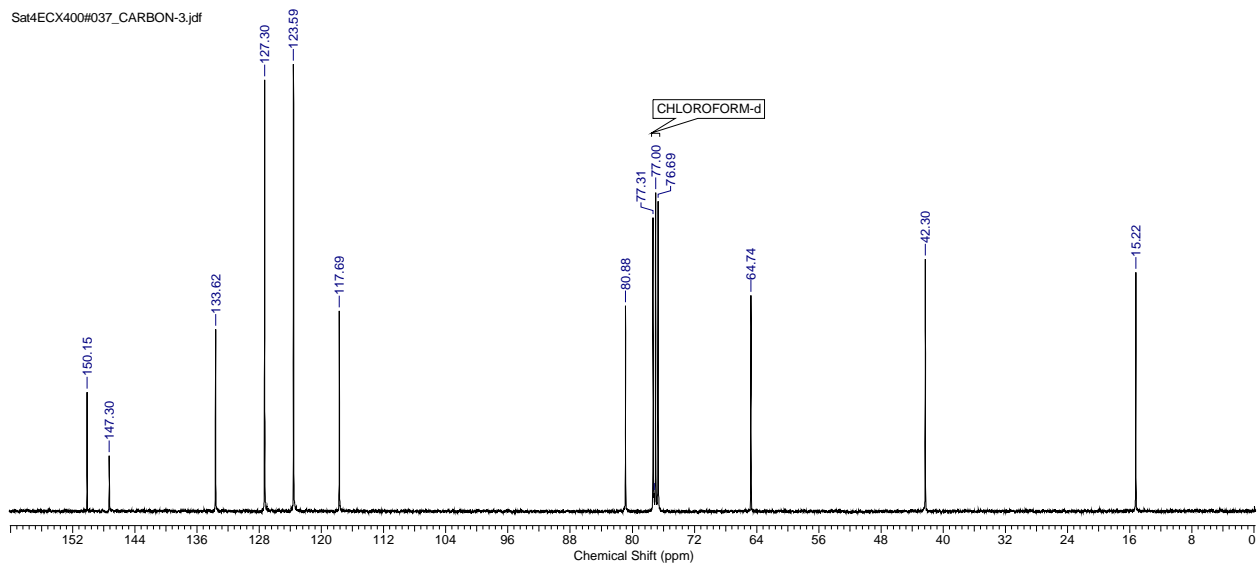

Sat4ECX400#037\_DEPT135-3.jdf

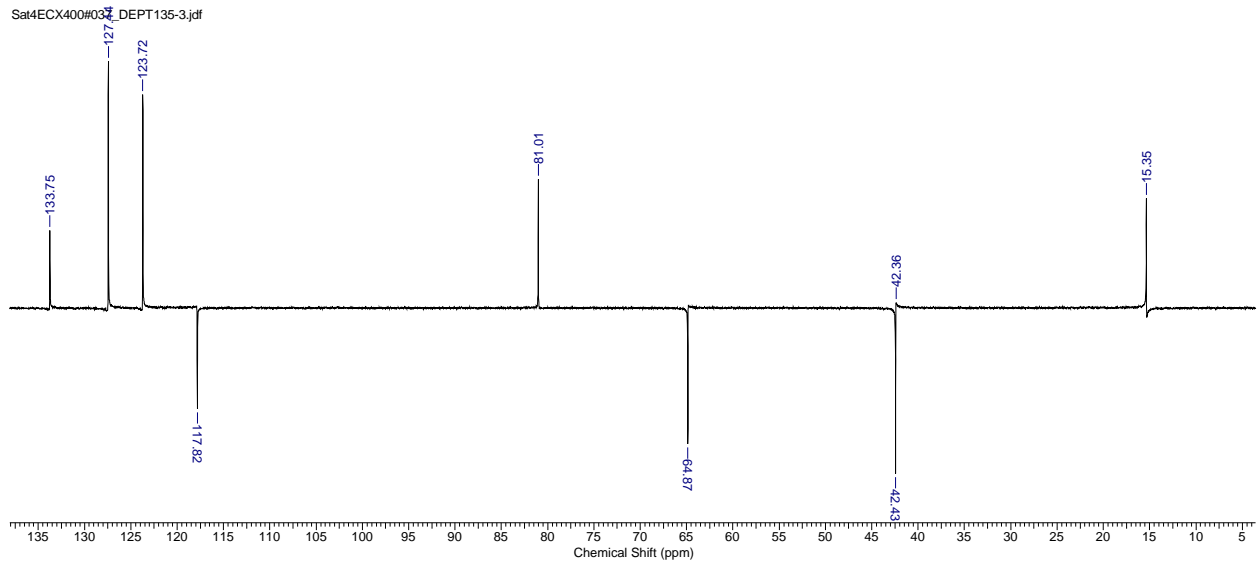



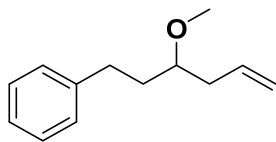

(3-methoxyhex-5-en-1-yl)benzene (Table 2, entry 14)

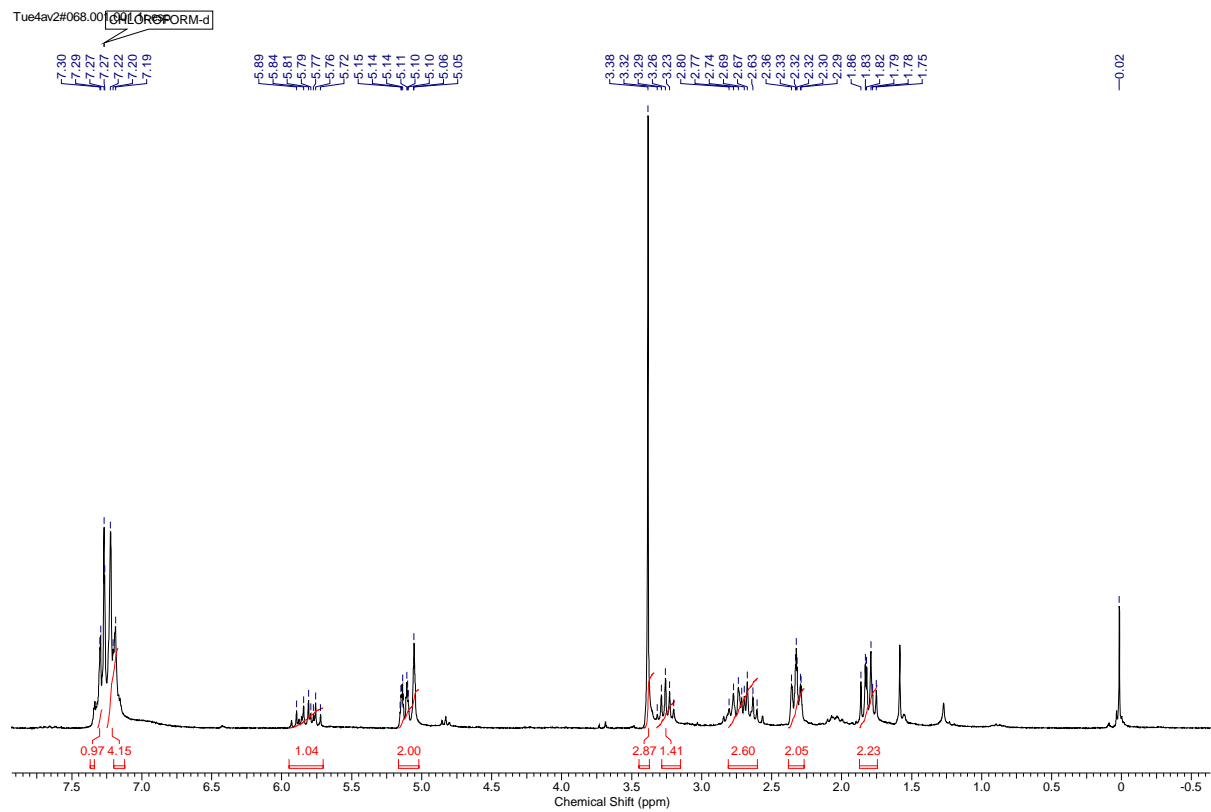

SAT4AV2#065.002.001.1R.esp

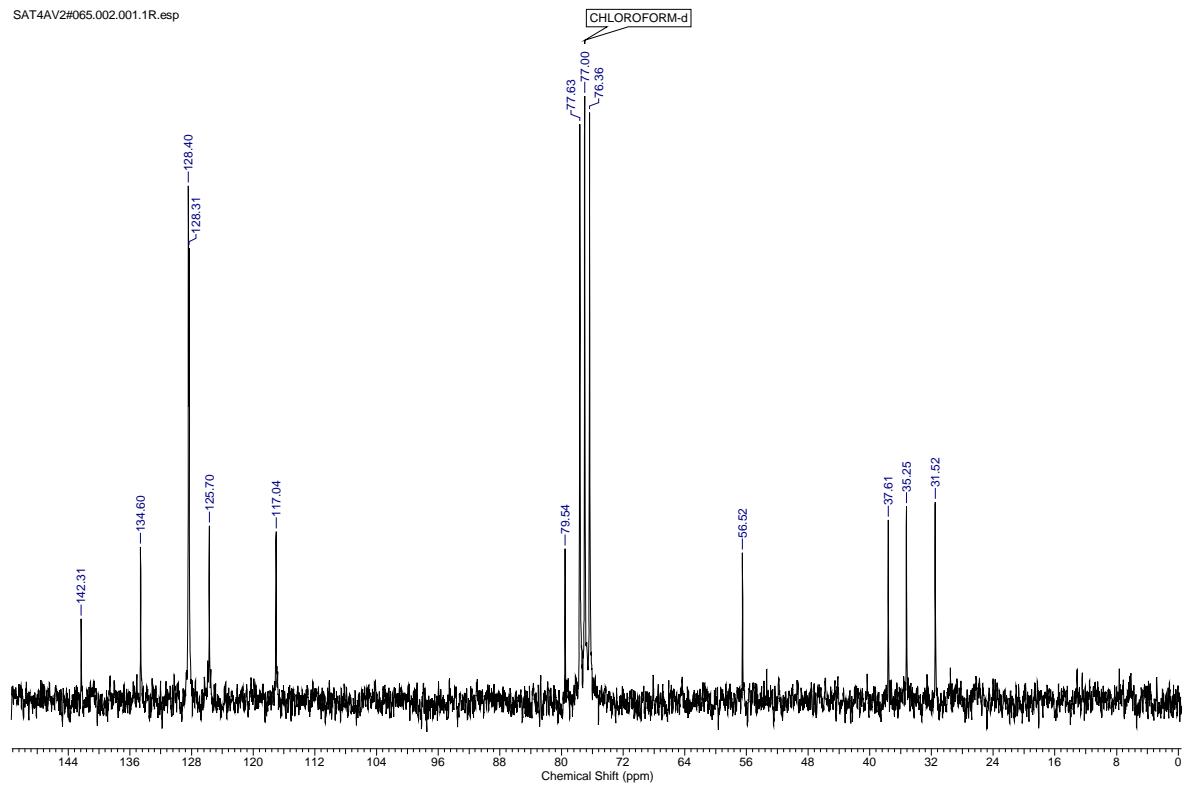

SAT4AV2#065.001.001.1R.esp

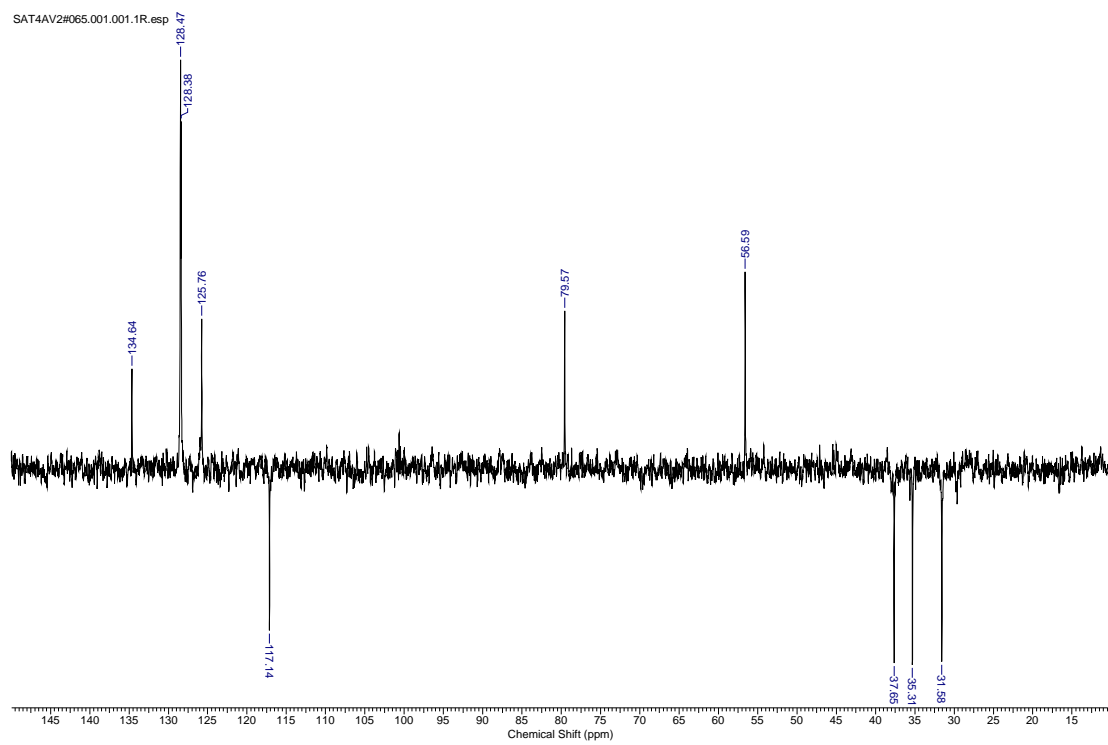

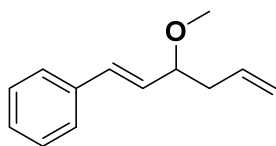

(E)-(3-methoxyhexa-1,5-dien-1-yl)benzene (Table 2, entry 15)

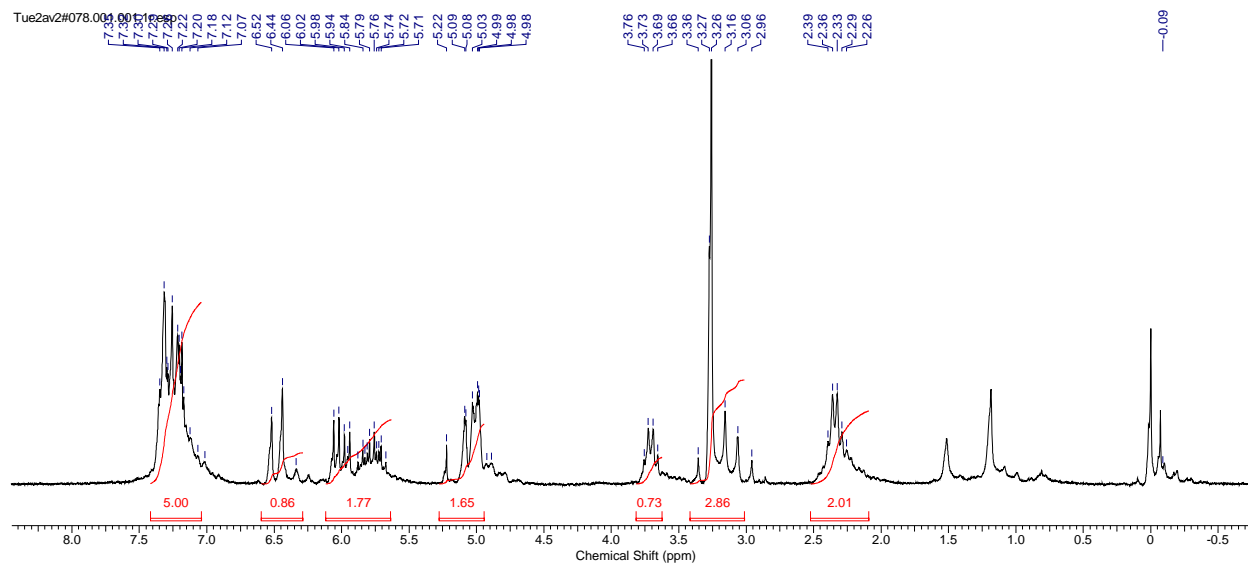

Thu2ECX400#013\_CARBON133.jf

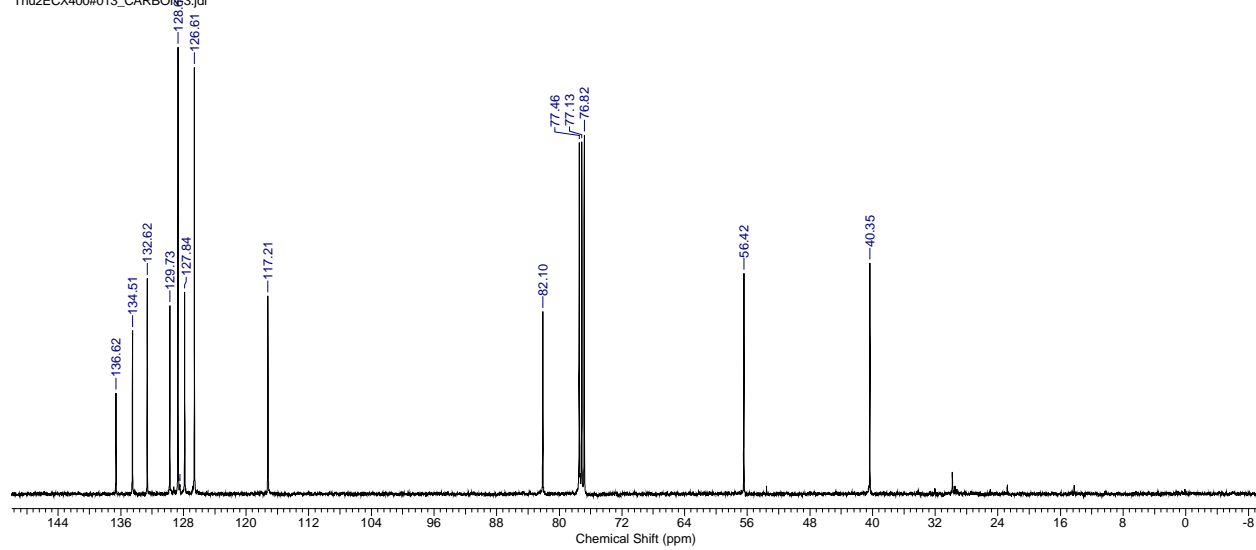

Thu2ECX400#013\_DEPT135-3.jf

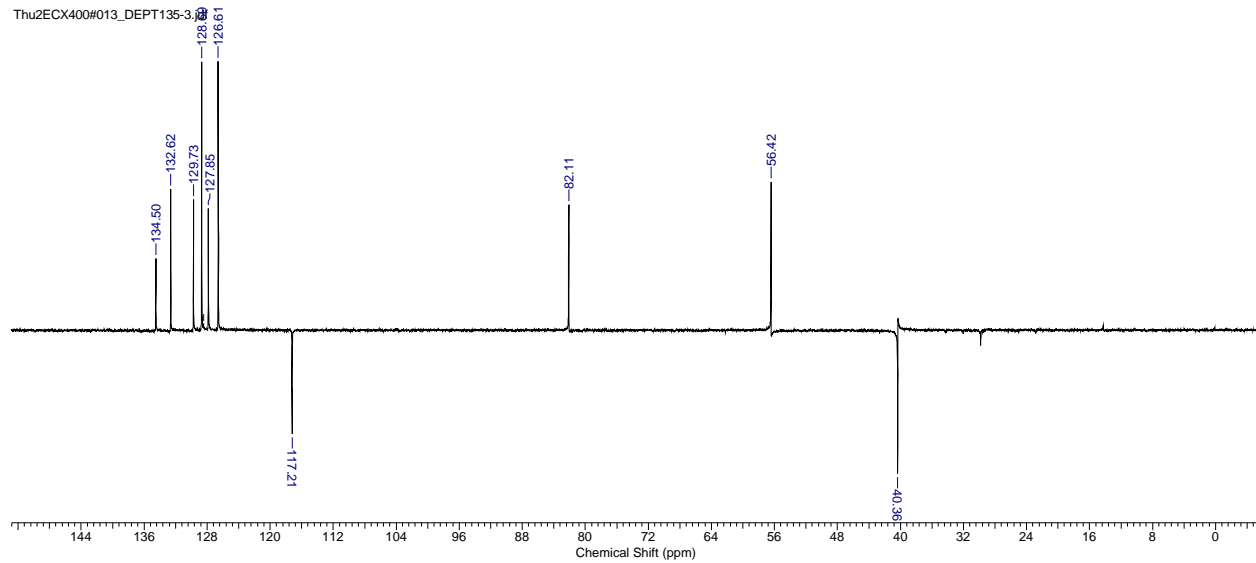

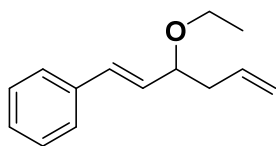

(E)-(3-ethoxyhexa-1,5-dien-1-yl)benzene (Table 2, entry 16)

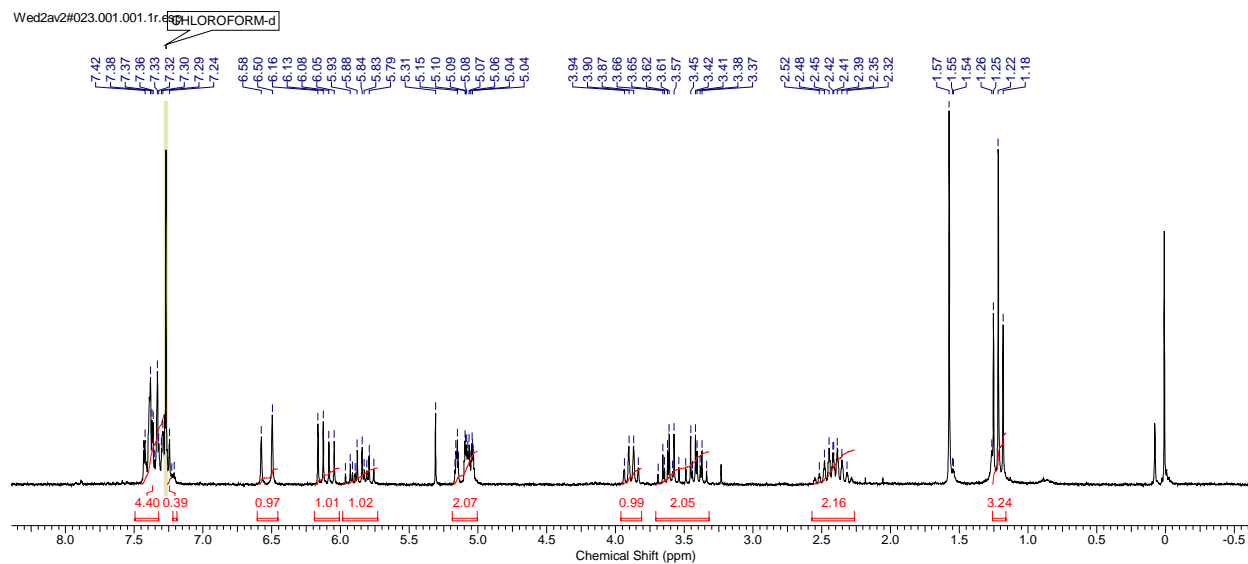

Sat2ECX400#046\_CARBON-3.jdf

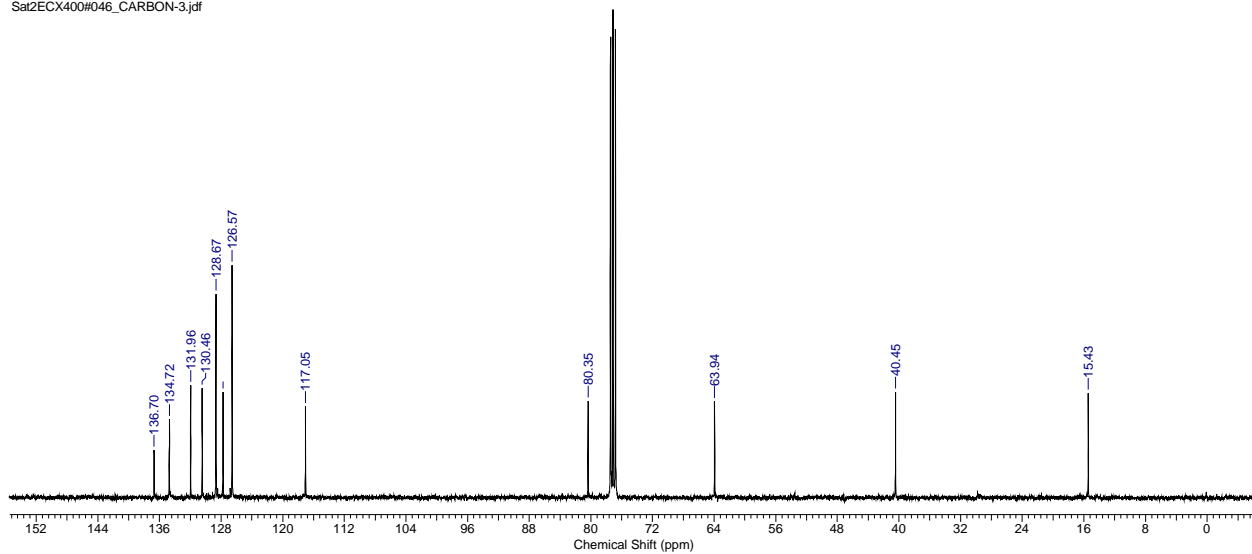

Sat2ECX400#046\_DEPT135-3.jdf

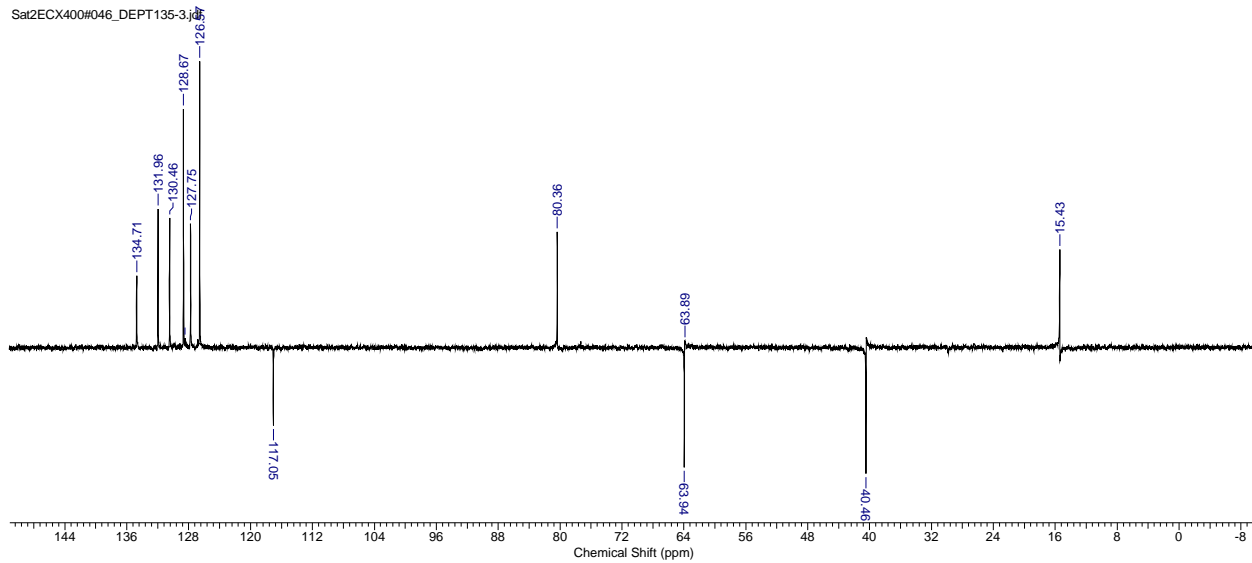

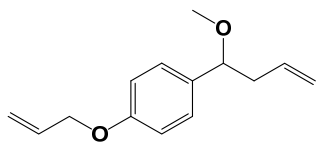

*1-(allyloxy)-4-(1-methoxybut-3-en-1-yl) benzene (Table 2, entry 17)*

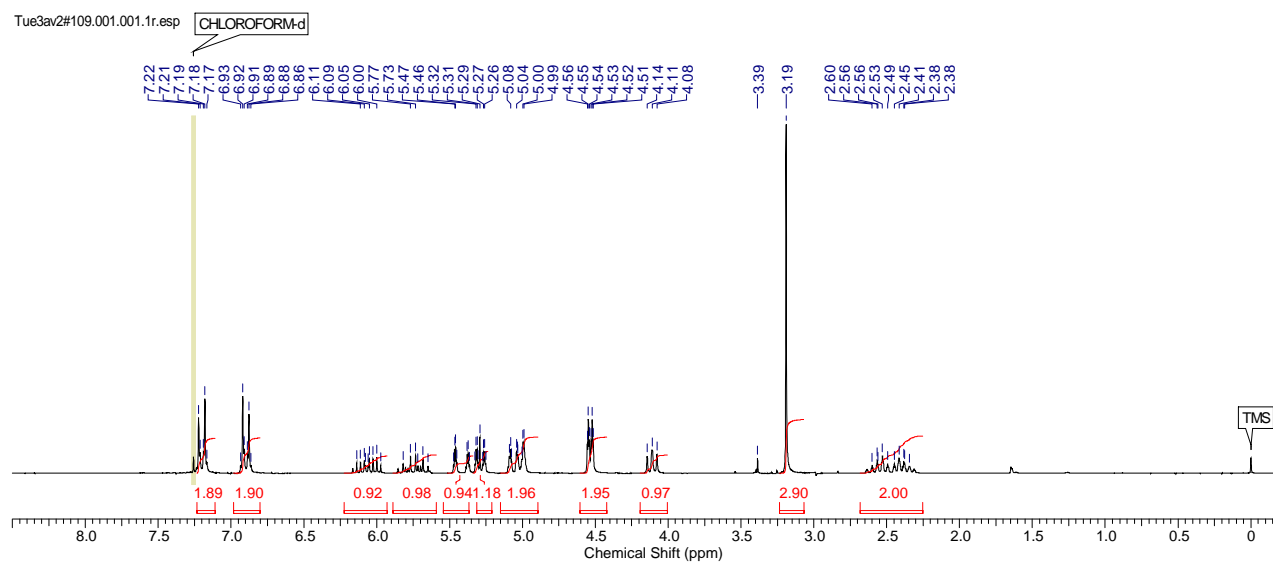

Wed3av2#067.002.001.1r.esp

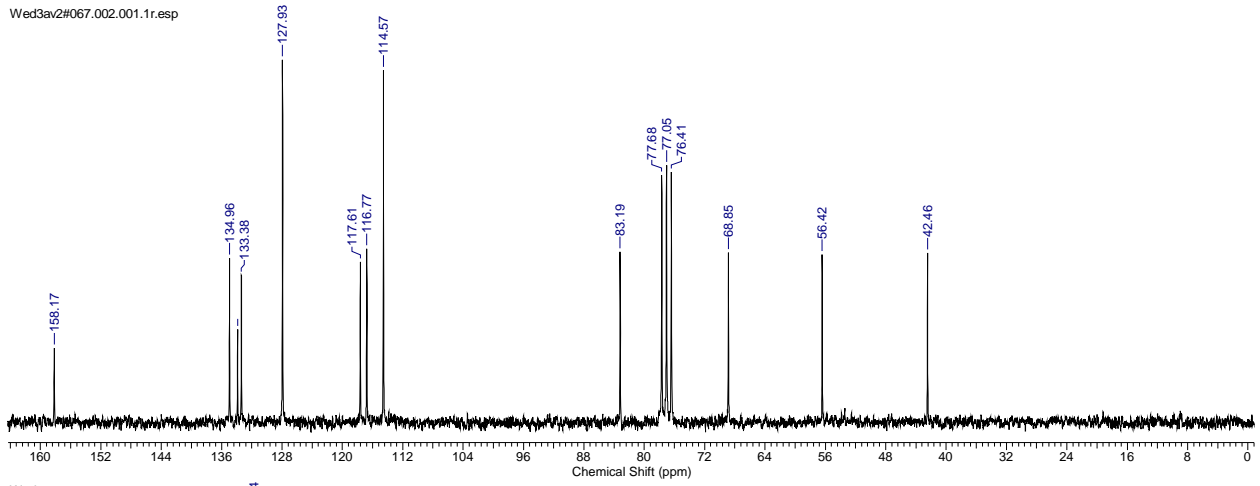

Wed3av2#067.001.001.1r.esp

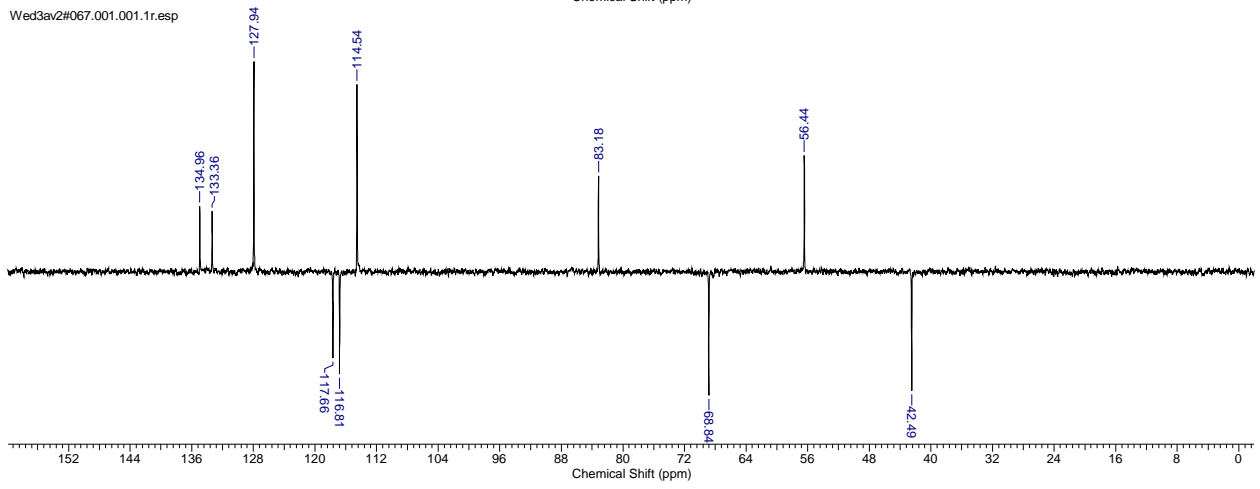



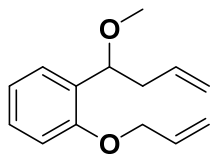

1-(allyloxy)-2-(1-methoxybut-3-en-1-yl) benzene (Table 2, entry 18)

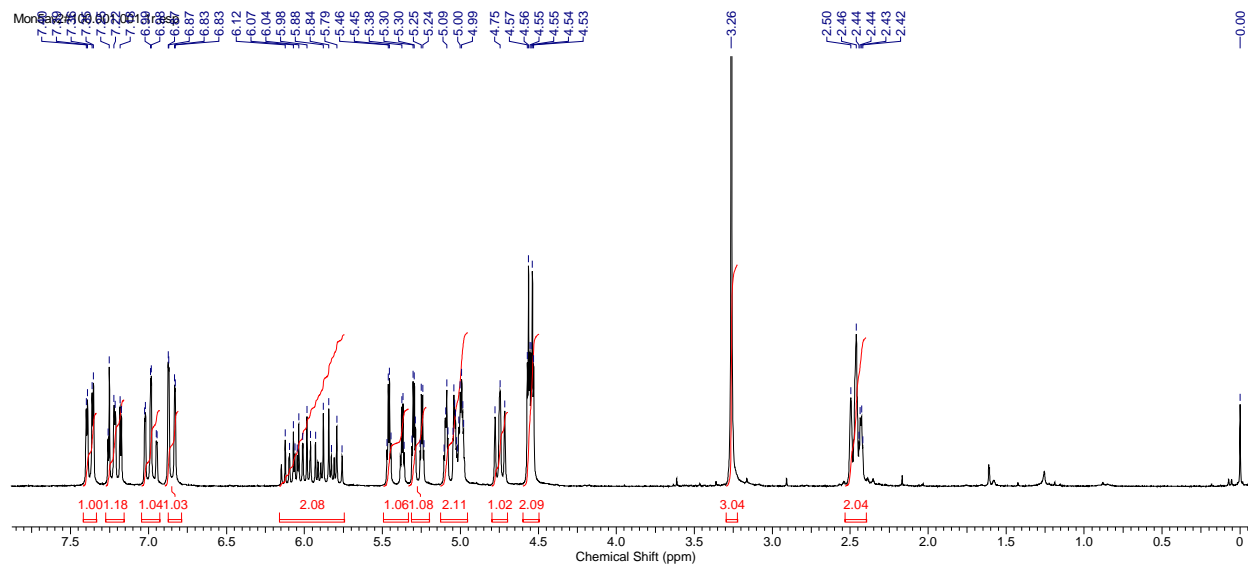

Tue5ECX400#001\_CARBON-3.jdf

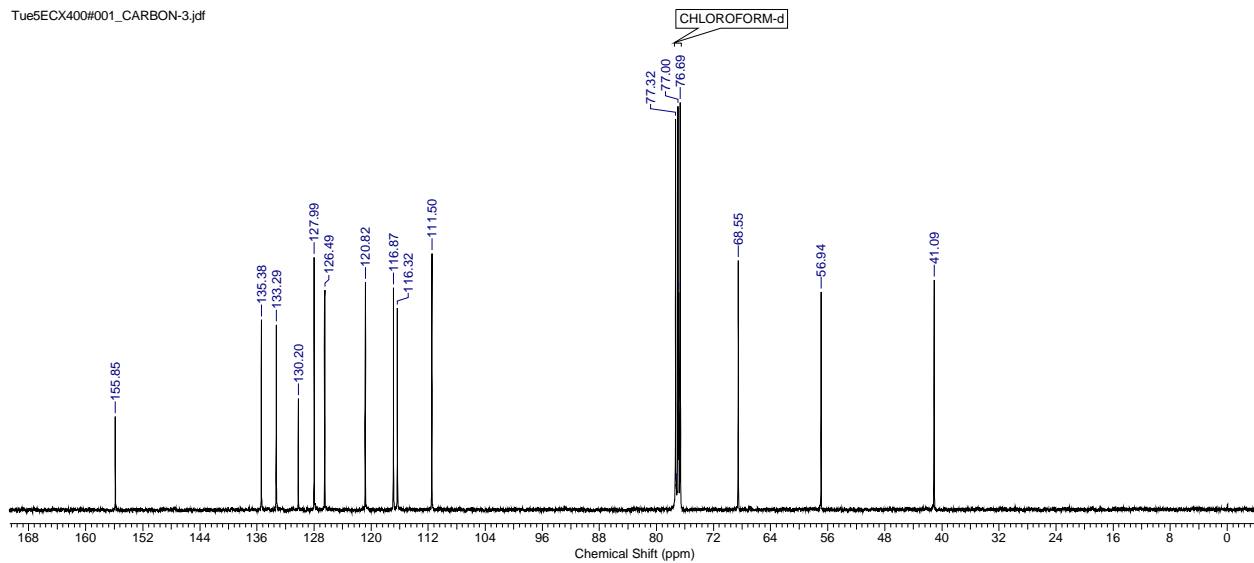

Tue5ECX400#001\_DEPT135-3.jdf

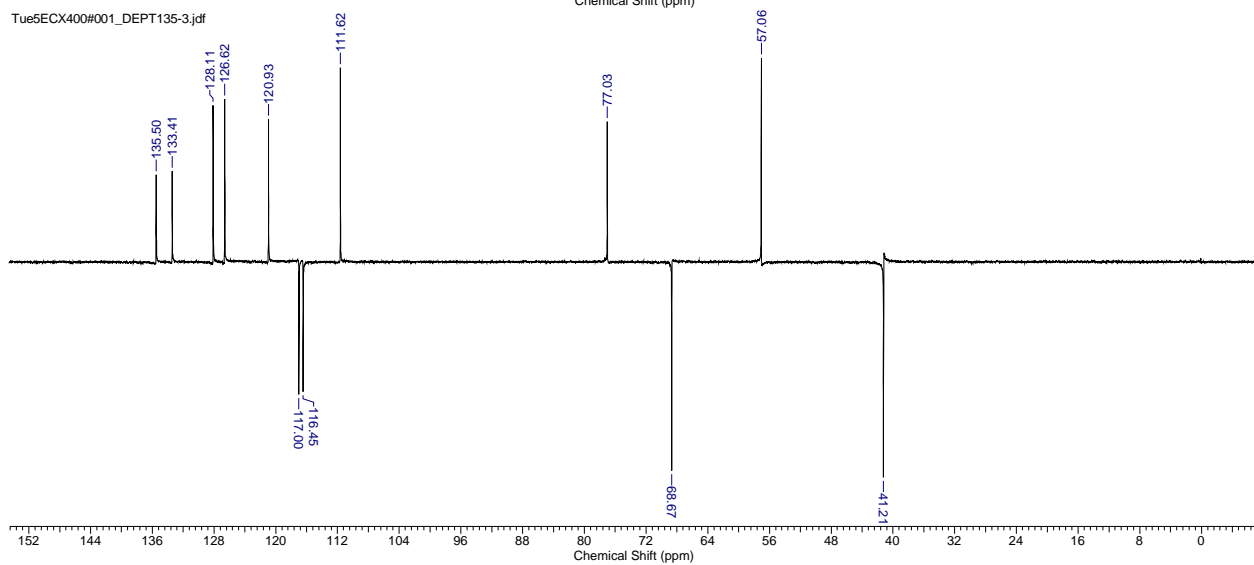



Thu3av2#117.002.001.1r.esp

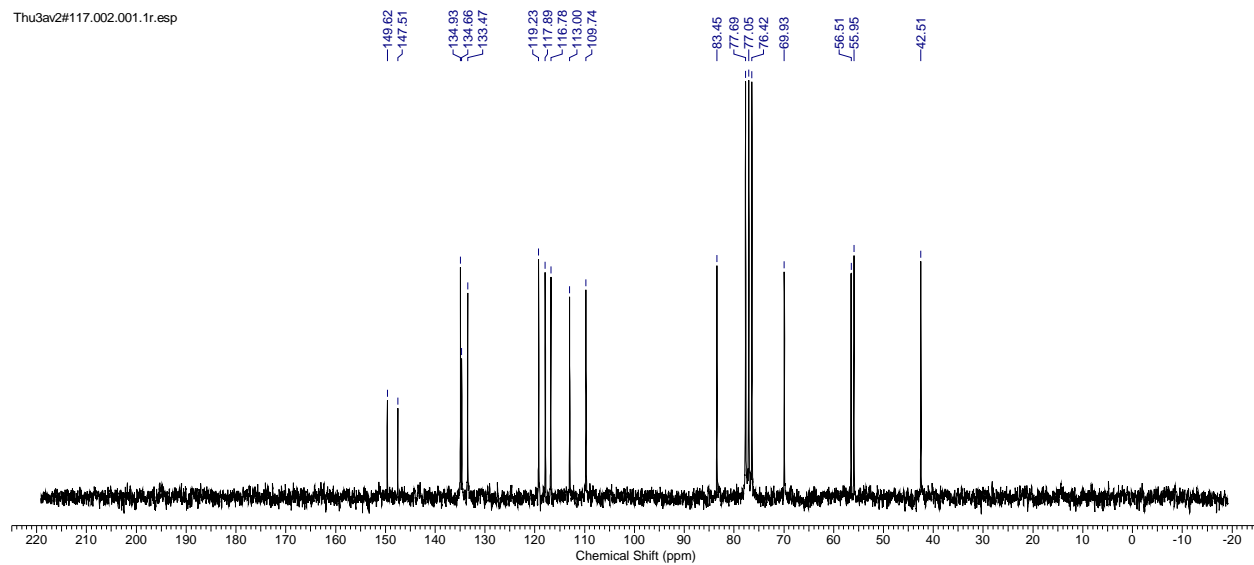

Thu3av2#117.001.001.1r.esp

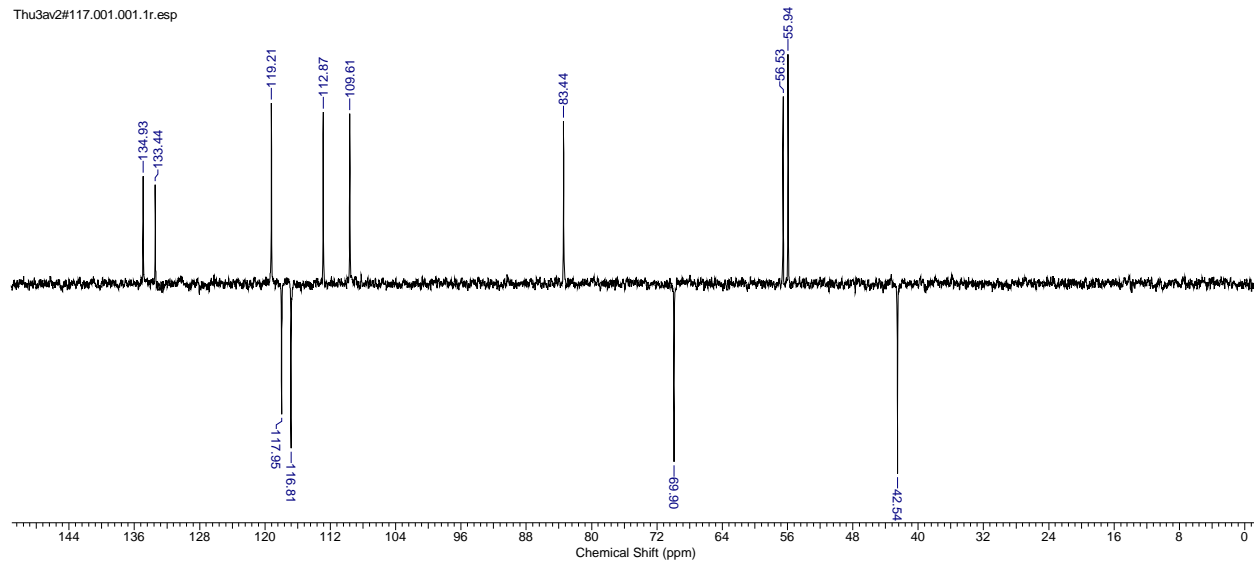

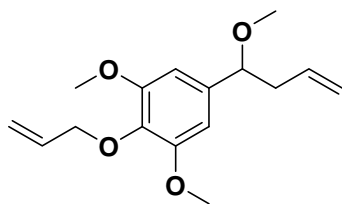

2-(allyloxy)-1,3-dimethoxy-5-(1-methoxybut-3-en-1-yl)benzene (Table 2, entry 20)

Tue4ECX1601286CP030101-3.jdf

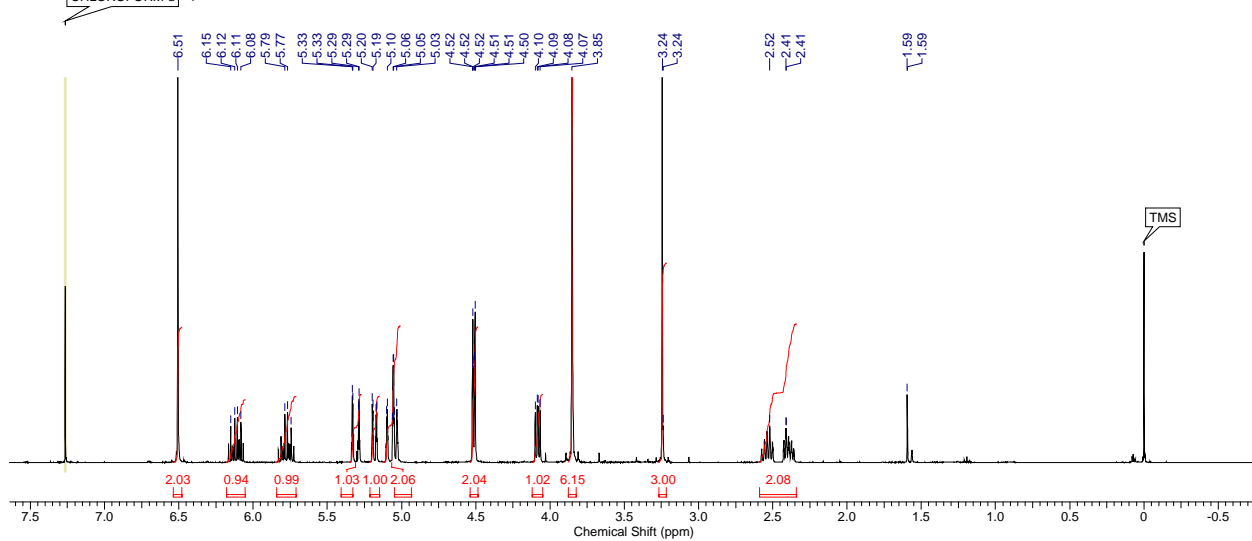

Thu4ECX400#005\_CARBON-3.jdf

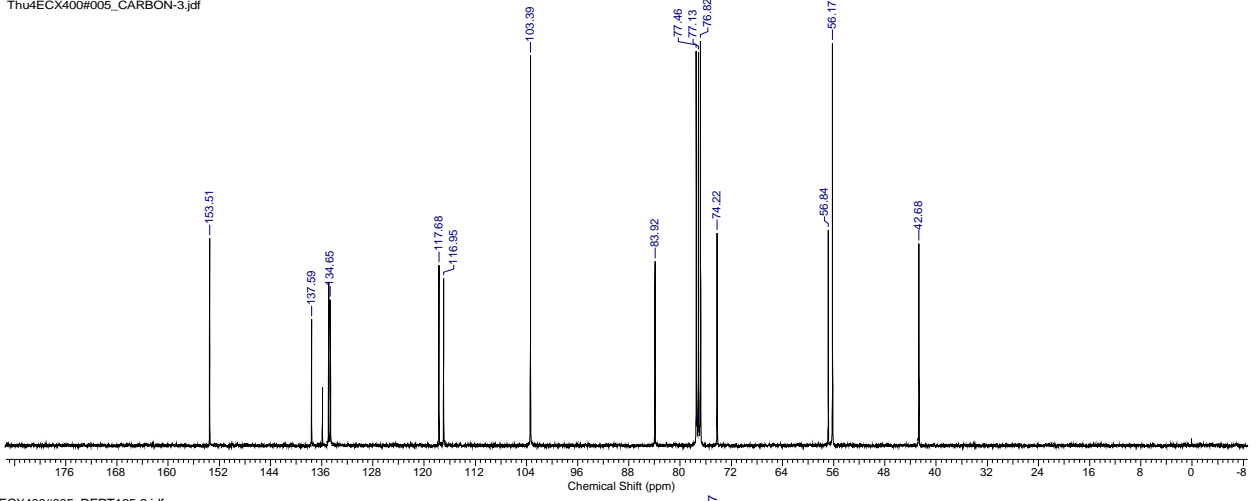

Thu4ECX400#005\_DEPT135-3.jdf

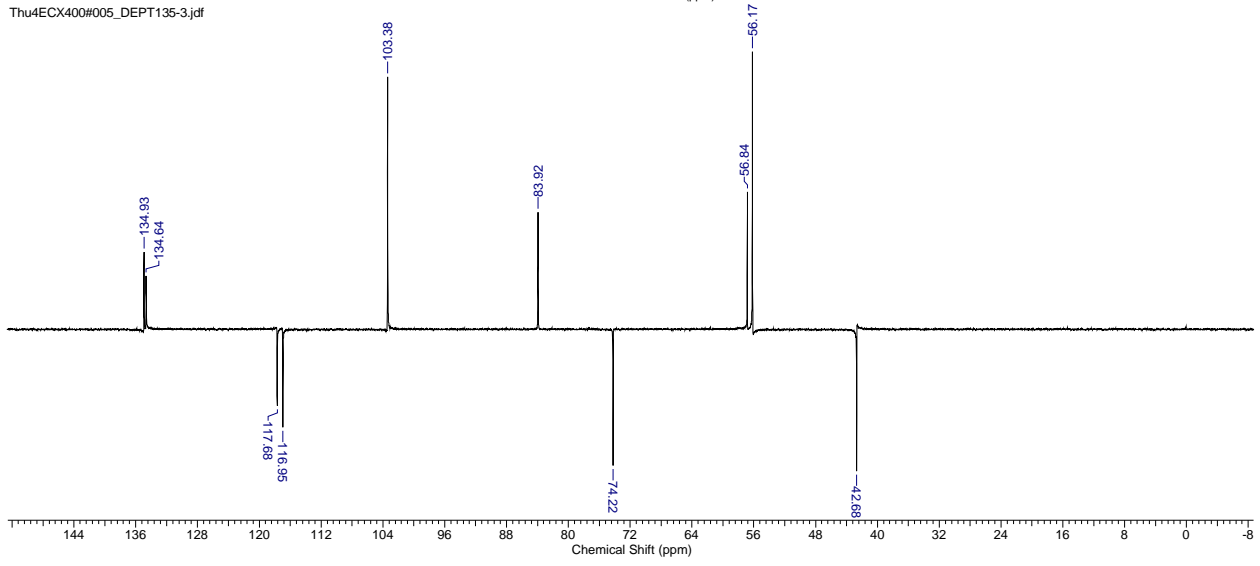

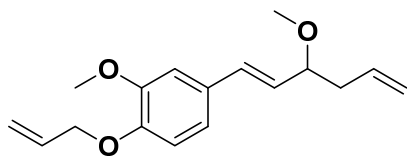

1-(allyloxy)-2-methoxy-4-(3-methoxyhexa-1,5-dien-1-yl)benzene (Table 2, entry 21)

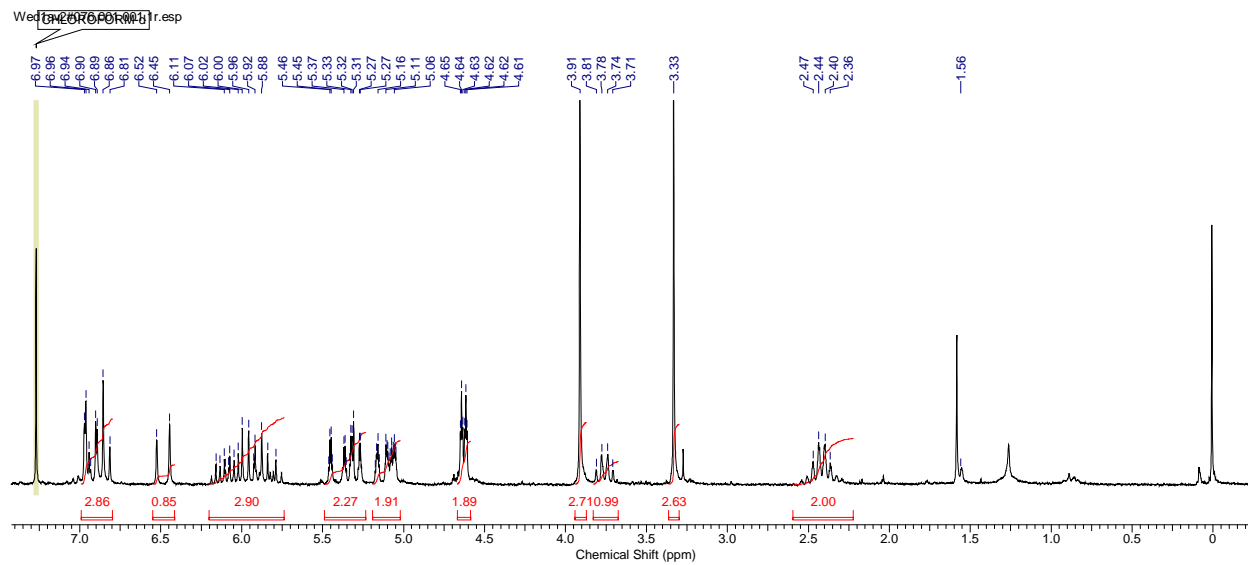

Wed1ECX400#039\_CARBON-3.jdf

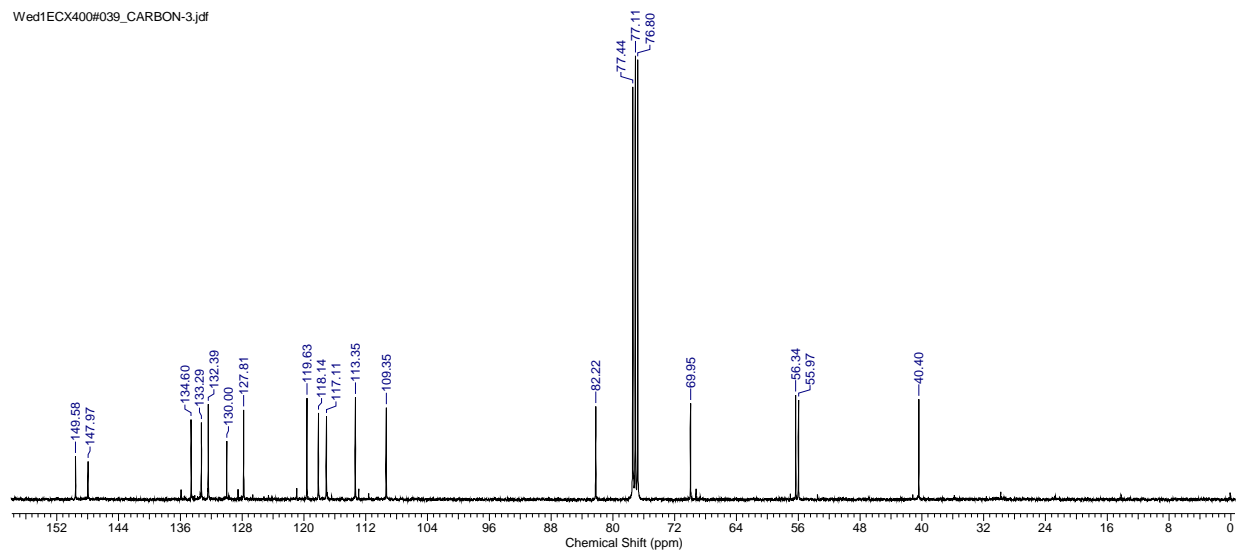

Wed1ECX400#039\_DEPT135-3.jdf

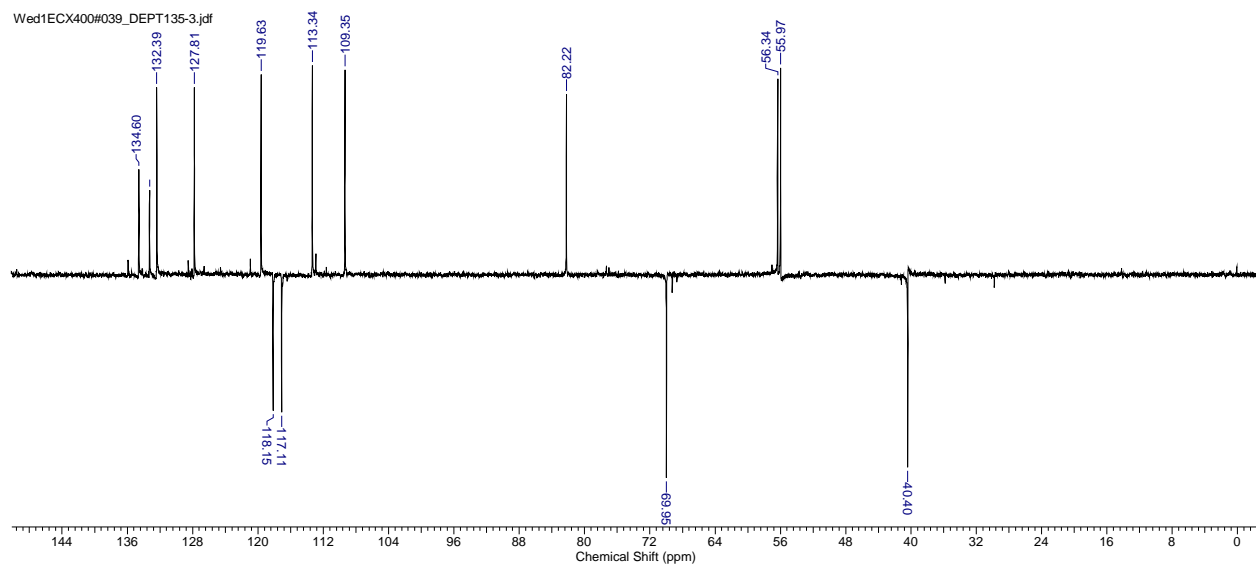

Supplement: c5cy00531k1.pdf [file c5cy00531k1.pdf]
